1 **Caspase-dependent activation of Hedgehog-signalling sustains proliferation**  
2 **and differentiation of ovarian somatic stem cells.**

3

4 **Alessia Galasso<sup>1</sup>, Daria Iakovleva<sup>1</sup>, Luis Alberto Baena-Lopez<sup>1\*</sup>**

5

6 \* Author for correspondence

7 1: Sir William Dunn School of Pathology. University of Oxford. South Parks Road.

8 Oxfordshire, UK. OX13RE

9

10 **Key words:**

11

12

13 **ABSTRACT**

14 There is increasing evidence associating the role of caspases with the regulation of  
15 basic cellular functions beyond apoptosis. However, the molecular interplay between  
16 these enzymes and the signalling networks active in non-apoptotic cellular scenarios  
17 remains largely uncharacterized. Here, we show that transient and non-apoptotic  
18 caspase activation facilitates Hedgehog-signalling in *Drosophila* and human ovarian  
19 cells with a somatic origin. Importantly, this novel caspase function controls gene  
20 expression, cell proliferation, and differentiation. We also molecularly link this  
21 uncovered caspase role with the fine regulation of the Hedgehog-receptor, Patched.  
22 Altogether, these findings strikingly suggest that caspase activation can act as a pro-  
23 survival factor that promotes the expansion and differentiation of normal healthy  
24 cells. These observations have profound implications on our understanding of  
25 caspase biology from a cellular, physiological and evolutionary perspective.

26 **MAIN**

27 The transient and moderate activation of caspases in specific subcellular  
28 compartments is essential for the regulation of a diverse range of cellular functions  
29 beyond apoptosis<sup>1-4</sup>. However, the molecular details underlying these non-apoptotic  
30 functions are largely unknown in many cellular scenarios. Addressing this question  
31 can provide essential information to fully understand caspase biology, as well as the  
32 physiological role of these enzymes in a wide variety of cells, including stem cells.

33 During the last decade, the adult *Drosophila* ovary has been extensively used to  
34 investigate stem cell physiology and intercellular communication<sup>5, 6</sup>. Additionally, it is  
35 one of the cellular models that shows widespread non-apoptotic caspase activation  
36 in response to environmental stress<sup>7</sup>. Therefore, it appears to be an ideal cellular  
37 system to study the interplay between caspases, signalling mechanisms, and stem  
38 cell physiology. The early development of *Drosophila* female gametes occurs in a  
39 cellular structure referred to as the germarium. The germarium is formed by the  
40 germline and the surrounding somatic cells<sup>5, 6</sup> (Figure. 1a). One of the main genetic  
41 cascades coordinating the physiology of somatic and germinal cells is the Hedgehog-  
42 signalling pathway<sup>8-14</sup>. The interaction of the Hedgehog (Hh) ligand with its  
43 membrane receptor Patched (Ptc) allows the activation of the signalling transducer  
44 Smoothed (Smo)<sup>15</sup>. This ultimately prevents the proteolytic processing of the  
45 transcriptional regulator Cubitus interruptus (Ci)<sup>15</sup>, thus eliciting the activation of  
46 multiple target genes<sup>15</sup>. The main somatic Hh-activating cells in the germarium are  
47 the escort cells<sup>12</sup> and the follicular stem cells<sup>13</sup> (Fig. 1a). Hh-pathway activation in the  
48 escort cells controls the signals that emanate to the germline<sup>9, 12</sup>. This remote system  
49 of signalling modulates the timely differentiation of the germline<sup>9, 12</sup>. In the follicular  
50 stem cells, Hh-pathway activation promotes cell proliferation and cell differentiation<sup>11,</sup>  
51 <sup>14, 16, 17</sup>, while Hh-deficiency has the opposite effect<sup>8, 11, 13</sup>. Importantly, the pro-  
52 proliferative role of Hh-signalling in ovarian somatic cells is evolutionarily  
53 conserved<sup>18-20</sup>. Furthermore, while an increase in Hh-signalling stimulates tumour  
54 growth and metastatic behaviour of ovarian somatic malignancies<sup>20, 21</sup>, its  
55 downregulation through chemical agents or genetic factors compromises cell division  
56 and differentiation<sup>19, 21, 22</sup>.

57 Our work shows that non-apoptotic caspase activation in somatic cells of the  
58 *Drosophila* germarium modulates Hh-signalling, autophagy, and the cellular  
59 properties of ovarian somatic cells. We also molecularly connect this unexpected

60 caspase functions with the fine-tuning of Ptc levels. Finally, our findings suggest that  
61 the caspase-dependent effects on Hh-signalling and autophagy are evolutionarily  
62 conserved in human ovarian cells with somatic origin. Altogether, these observations  
63 uncover unknown features of caspase biology, whilst conferring a pro-survival role to  
64 these enzymes in the ovary.

65

## 66 **RESULTS**

### 67 **Non-apoptotic Dronc activation in ovarian somatic stem cells**

68 We recently generated a novel caspase sensor based on a cleavable, but  
69 catalytically inactive version of the effector caspase, *Drice* (Drice based sensor QF;  
70 DBS-S-QF)<sup>23</sup>. Among other applications, this sensor can be used to induce the  
71 expression of multiple fluorescent markers with variable perdurance in caspase-  
72 activating cells<sup>23</sup>. This feature is able to provide a short-term perspective of caspase  
73 activation dynamics, as well as a permanent labelling of caspase-activating cells in  
74 *Drosophila* tissues<sup>23</sup>. Since it has been shown that strong environmental stress  
75 (starvation and cold shock) can induce widespread non-apoptotic caspase activation  
76 in the *Drosophila* ovary<sup>7</sup>, we sought to investigate whether under moderate stress  
77 such activation could exist and follow a stereotyped pattern. The detailed inspection  
78 of adult flies maintained at 29 °C showed discrete subsets of escort and follicular  
79 cells labelled with the short-lived fluorescent markers induced by our caspase sensor  
80 (Fig. 1b). Interestingly, marked cells did not always show signs of cell death such as  
81 DNA fragmentation (green positive cells and TUNEL negative in Fig.1b).  
82 Furthermore, they often displayed only the fluorescent signature of caspase  
83 activation in the past (green signal, Fig. 1b), but not the marker of ongoing caspase  
84 activation at the time of dissection (red signal, Fig. 1b). Confirming the presence of  
85 transient caspase activation in healthy and proliferative cells, large groups of  
86 follicular cells including the follicular stem cells and escort cells were permanently  
87 labelled with the DBS-S-QF caspase sensor (Fig. 1c). Furthermore, the number of  
88 enduringly labelled germaria with this system increased over time (from 8% to 22% in  
89 ovaries dissected at 7 and 14 days after adult eclosion, respectively; Fig. 1d). These  
90 results demonstrated the presence of transient and non-apoptotic caspase activation  
91 in somatic cells of the germarium, including the proliferative stem cell precursors,  
92 under moderate stress.

93 Since DBS-S-QF was designed to specifically report the activation of initiator  
94 caspases<sup>23</sup>, and *Dronc* (the *Drosophila* orthologue of the mammalian caspase-9) is  
95 the main initiator *Drosophila* caspase associated with non-apoptotic functions, we  
96 sought to investigate its transcriptional regulation in the ovary by using a *Dronc*<sup>KO-Gal4</sup>  
97 strain generated in the laboratory that recapitulates physiological expression of this  
98 gene<sup>24</sup>. *Dronc*<sup>KO-Gal4</sup> was able to drive the expression of a UAS-Histone-RFP  
99 transgene in the escort and follicular cells of the germarium at 29°C (Fig. 1e, f). This  
100 expression pattern was also confirmed through cell lineage-tracing experiments  
101 using the same Gal4 driver (Fig. 1g). This data strongly suggested that *Dronc* could  
102 be responsible for the caspase activation patterns observed with DBS-QF sensor  
103 (compare Fig. 1c, 1f and 1g).

#### 104 ***Dronc* acts as a pro-survival factor that sustains follicular stem cell functions**

105 To determine the biological relevance of caspase activation in the germarium, we  
106 took advantage of a conditional allele of *Dronc* generated through genome  
107 engineering protocols<sup>24, 25</sup>. This allele contains a wild-type *Dronc* cDNA flanked by  
108 FRT recombination sites followed by a transcriptional activator QF (hereafter  
109 *Dronc*<sup>FRT-Dronc-FRT-QF</sup>)<sup>24</sup>. To test the excision efficiency of the *Dronc* FRT-rescue  
110 cassette, we expressed flippase recombinase within the escort and follicular stem  
111 cells under the regulation of c587-Gal4<sup>26</sup> (Supplementary Fig. 1a). The excision of  
112 the cassette allowed the activation of the transcriptional QF factor under the  
113 physiological regulation of the *Dronc* promoter, and the subsequent activation of a  
114 GFP marker (QUAS-CD8-GFP) within the somatic cells transcribing *Dronc* in all of  
115 the analysed germaria (n=20; Supplementary Fig. 1b). These experiments confirmed  
116 the transcriptional patterns of *Dronc* in the germarium, whilst demonstrating the  
117 suitability of our conditional allele to efficiently target *Dronc* expression in different  
118 somatic cell populations, including those with low rates of proliferation (e.g. escort  
119 cells). Combining this allele with the 109-30-Gal4 driver, we next preferentially  
120 removed *Dronc* expression in the follicular stem cells and their progeny<sup>13</sup>  
121 (Supplementary Fig. 1c). This genetic manipulation reduced the expression of the  
122 somatic marker Castor (Fig. 2a and 2b), the number of follicular cells, and the size of  
123 the 2b region of the germarium (Supplementary Fig. 1 d-e). Additionally, we noticed  
124 that these genetic manipulations facilitated the expansion of the area in the  
125 germarium occupied by Orb-positive cells (germline cells; Fig. 2c and 2d). These  
126 initial results indicated the ability of *Dronc* to regulate the cellular properties of  
127 somatic stem cells and the germline in the germarium. In a complementary set of  
128 experiments, we preferentially targeted the expression of *Dronc* in escort cells using

129 the *spitz*-Gal4 driver (Supplementary Figure 1f). Castor expression was almost  
130 unaffected by these genetic manipulations (Fig. 2b, e), and was only reduced when  
131 the *spitz*-Gal4 driver was expressed in follicular stem cells (Supplementary Fig. 1g).  
132 However, *Dronc* deficiency in the escort cells led to a pronounced expansion of the  
133 germline (Orb-positive cells, Fig. 2d, f). The simultaneous elimination of *Dronc*  
134 expression in escort and follicular cells using c587-Gal4 recapitulated all the  
135 aforementioned phenotypes in somatic cells and the germline (Castor  
136 downregulation and Orb expansion; Figure 2b, d). Confirming the specificity of our  
137 results with *Dronc* expression, equivalent results were obtained using a different  
138 conditional allele, which expressed a Suntag-HA-Cherry chimeric protein instead of  
139 QF upon the FRT-rescue cassette excision ( $Dronc^{KO-FRT} Dronc-GFP-Apex FRT-Suntag-HA-Cherry$   
140 <sup>24</sup>, Fig. 2g). Furthermore, the overexpression of a *Dronc*-RNAi construct under the  
141 regulation of  $Dronc^{KO-Gal4}$  generated a comparable, but less penetrant, version of the  
142 described phenotypes (Supplementary Fig. 1h, i). Together this data confirmed that  
143 the non-apoptotic activation of Dronc can act as a pro-proliferative and pro-  
144 differentiating factor in the follicular stem cells. Additionally, it can regulate at a  
145 distance the cellular properties of adjacent germline cells.

#### 146 **The function of Dronc in ovarian somatic cells relies on its catalytic activity but** 147 **is largely independent of the apoptosis programme**

148 Most functions of caspases rely on their enzymatic activity, but some of the non-  
149 apoptotic roles require only protein-protein interactions<sup>27, 28</sup>. To determine whether  
150 *Dronc* mutant phenotypes were correlated with its enzymatic activity, we used a new  
151 conditional allele that contains after the FRT-rescue cassette a *Dronc* allele encoding  
152 a catalytically inactive protein<sup>24</sup>. This inactive version of Dronc contains two  
153 mutations, C318A and E352A, which compromise its enzymatic function and  
154 proteolytic activation<sup>29, 30</sup>. This mutant allele behaves as a null in homozygous  
155 conditions and is referred hereafter as *Dronc*-FL-CAEA ( $Dronc^{KO-FRT} Dronc-GFP-Apex FRT-$   
156  $Dronc-FL-CAEA-Suntag-HA-Cherry$ )<sup>24</sup>. Upon excision of the wildtype rescue cassette, the  
157 expression of *Dronc*-FL-CAEA mutant protein recapitulated the loss of Castor  
158 expression and the cell proliferation defects in the 2b region of the germarium (Fig.  
159 2g). Since these experiments indicated a requirement for the enzymatic activity of  
160 Dronc, we investigated the potential contribution to the Dronc phenotypes of its  
161 primary substrates in many cellular contexts, the effector caspases (drlCE, DCP-1,  
162 Decay and Damm)<sup>31</sup>. To avoid a potential functional redundancy between these  
163 caspase members<sup>32</sup>, we simultaneously targeted their expression by overexpressing

164 at the same time validated RNAi constructs against all of them<sup>31</sup>. These genetic  
165 manipulations produced weaker phenotypes than the *Dronc* loss-of-function (LOF),  
166 but still compromised Castor expression (Fig. 2g). Next, we analysed the role of the  
167 main upstream pro-apoptotic factors by targeting their expression via a micro RNA  
168 (UAS-RHG miRNA: *rpr*, *hid*, and *grim*)<sup>33</sup>. Strikingly, the concomitant elimination of  
169 *hid*, *reaper* and *grim* expression did not affect Castor levels (Fig. 2g). Collectively,  
170 these results indicate that *Dronc* functions in our cellular scenario demand its  
171 enzymatic activity and the subsequent activation of effector caspases, but are largely  
172 independent of the apoptotic programme.

### 173 **Dronc activation promotes Hh-signalling in escort cells and follicular stem** 174 **progenitors**

175 Since Hh-signalling deficiency in escort and follicular stem cells generates  
176 phenotypes highly reminiscent of our *Dronc* mutant conditions<sup>8, 9</sup> (compare Fig. 2  
177 with Supplementary Fig. 2a-c), we assessed the expression levels of standard read-  
178 outs of Hh-signalling in *Dronc* mutant cells. *Dronc* deficiency in follicular stem cells  
179 reduced the levels of the transcriptionally active form of Cubitus interruptus (Ci-155<sup>34</sup>,  
180 Gli in mammals; compare Fig. 3a and 3b). Accordingly, the transcriptional activation  
181 of *ptc* was also compromised (compare Figure 3a with 3b; Supplementary Fig. 2d).  
182 The downregulation of both markers in *Dronc* mutant cells was a strong indication of  
183 Hh-signalling defects. To functionally confirm the crosstalk between caspases and  
184 Hh-signalling, we attempted to rescue the *Dronc* mutant phenotypes by  
185 overexpressing either a constitutively active form of Smo<sup>15</sup> (Fig. 3c, d) or Ci  
186 (Supplementary Fig. 2e, f). The individual overexpression of any of these Hh-  
187 components restored Castor expression and the proliferation defects of *Dronc*  
188 mutant cells (Fig. 3e). These data directly associated the *Dronc* LOF phenotypes in  
189 the germarium with Hh-signalling defects. Furthermore, they genetically placed  
190 *Dronc* upstream of *smo*.

### 191 **Dronc regulates Hh-signalling through the fine-tuning of Ptc**

192 Since our previous experiments placed the activation of *Dronc* upstream of *smo*, we  
193 investigated a potential genetic interaction between *Dronc* and *ptc*. A Gal4 P-element  
194 insertion in the regulatory region of *ptc* generated a weak LOF allele and a Gal4  
195 line<sup>35</sup>. Unexpectedly, double heterozygous germaria *ptc-Gal4:Dronc<sup>KO</sup>* (*ptc-Gal4/+*;  
196 *Dronc<sup>KO</sup>/+*) phenotypically resembled the homozygous mutant condition for *Dronc*;  
197 Castor expression was downregulated (Fig. 4a-c) and Orb territory was expanded

198 (Fig. 4d-f). These phenotypes were also correlated with Hh-signalling defects, as  
199 indicated by Ci downregulation (Supplementary Fig. 2g). To validate this  
200 unanticipated interaction, we overexpressed a *Dronc*-RNAi construct under the  
201 regulation of the *ptc*-Gal4 driver (Supplementary Fig. 2h), and created double  
202 heterozygous flies harbouring a null allele of *ptc* (*ptc*<sup>S2</sup>) and our *Dronc*<sup>KO</sup> (*ptc*<sup>S2/+</sup>;  
203 *Dronc*<sup>KO/+</sup>, Supplementary Figure 2i). All of these genetic combinations showed  
204 comparable phenotypes. Furthermore, the observed phenotypes were dose-  
205 dependent and worsen by fully eliminating *Dronc* expression (*ptc*-Gal4/UAS-*flp*;  
206 *Dronc*<sup>KO</sup>/*Dronc*<sup>FRT-Dronc-FRT-QF</sup>; Figure 4c, 4f-h). Collectively, these results suggested a  
207 clear, but initially counterintuitive, genetic interaction between *ptc* and *Dronc*. Since  
208 *ptc* is the receptor of Hh but acts a negative regulator of signalling, one would expect  
209 the upregulation of the pathway in *ptc* LOF conditions. Instead, the double  
210 insufficiency of *ptc* and *Dronc* severely compromised Hh-signalling.

211 To better understand the interaction between *Dronc* and *ptc*, we investigated the  
212 protein levels of the latter. Strikingly, although *ptc* was transcriptionally  
213 downregulated in *Dronc* mutant cells (Figure 3b), the protein levels were increased  
214 (Fig. 4i,j and Supplementary Fig. 3a). A detailed immunofluorescent analysis also  
215 revealed that Ptc positive particles were significantly enlarged in double  
216 heterozygous mutant germlaria *ptc*-Gal4:*Dronc*<sup>KO</sup> (Supplementary Fig. 3b).  
217 Confirming the association of *Dronc* phenotypes with Ptc aggregates, we largely  
218 rescued the Hh-signalling defects of *Dronc* mutant cells by preventing Ptc  
219 accumulation (Supplementary Fig. 3c-e). Recently, it has been described that Ptc  
220 can induce autophagy independently of its Hh-signalling regulatory role in  
221 mammalian cells and the *Drosophila* ovary<sup>17, 36</sup>. Therefore, we analysed whether the  
222 Ptc aggregates within *Dronc* mutant cells were competent to induce autophagy. To  
223 assess the autophagy flux in the germlarium we used as a read-out the levels of  
224 Ref2P (the *Drosophila* ortholog of the mammalian p62). p62 is upregulated in cells  
225 with the autophagy process compromised, and downregulated upon autophagy  
226 activation<sup>37</sup>. As indicated by the downregulation of Ref2P, the autophagy flux was  
227 enhanced in *Dronc* mutant cells (Fig. 4k, 4l and Supplementary Fig. 3f). Collectively,  
228 these findings indicated that the non-apoptotic activation of *Dronc* modulates Ptc  
229 levels, and secondarily the activation of the Hh-pathway and the autophagy flux.

230 **The caspase-mediated modulation of Hh-signalling and autophagy is**  
231 **evolutionarily conserved in human ovarian carcinoma cells**

232 To evaluate the evolutionary conservation of our *Drosophila* findings, we used a  
233 human ovarian cell line with somatic origin (OVCAR-3). This cell line, like many  
234 others of similar origin, shows a basal hyperactivation of Hh-signalling<sup>38</sup>. We first  
235 downregulated the expression of *caspase-9* using specific siRNAs (Fig. 5a), and then  
236 monitored the activation of the Hh-pathway by Q-PCR. A previously validated set of  
237 primers<sup>39</sup> was used to estimate the transcriptional levels of the universal Hh-target  
238 gene *ptch1*. As observed in *Drosophila* cells, *caspase-9* deficiency compromised the  
239 transcriptional activation of *ptch1* and therefore we conclude that Hh-signaling is  
240 altered in *caspase-9* deficient cells (Fig. 5b). Next, we investigated the impact of  
241 caspase deficiency on the autophagy flux, using as marker p62<sup>37</sup>. The protein levels  
242 of p62 did not change in *caspase-9* mutant cells grown in standard cell culture  
243 conditions; however, they were consistently reduced in *capase-9*-deficient cells  
244 exposed to low concentrations of EtOH (Fig. 5c and 5d). EtOH has been shown to  
245 induce cellular stress (mainly reactive oxygen species) and autophagy through  
246 multiple molecular pathways in many cell types<sup>40</sup>. Confirming the specificity of the  
247 *caspase-9* effects on the autophagy, inhibition of this cellular process with  
248 bafilomycin<sup>41</sup> rescued the downregulation of p62 in *caspase-9* mutant cells exposed  
249 to EtOH (Fig. 5c and 5d). Collectively, these findings suggest that caspases can also  
250 modulate the levels of Hh-signalling and autophagy under moderate stress  
251 conditions in human ovarian cells with somatic origin.

## 252 **DISCUSSION**

### 253 **Non-apoptotic activation of Dronc acts as a pro-survival factor in ovarian** 254 **somatic stem cells**

255 Our results show that the non-apoptotic activation of caspases modulates Hh-  
256 signalling and autophagy in ovarian somatic cells. Furthermore, these non-apoptotic  
257 caspase roles ensure the proper implementation of basic cellular functions such as  
258 cell proliferation, cell differentiation, and intercellular communication. These findings  
259 caution against the generic association of non-apoptotic patterns of caspase  
260 activation with the phenomenon of anastasis (pure recovery of caspase-activating  
261 cells from the “brink of death”)<sup>42, 43</sup>. Alternatively, they support the hypothesis that  
262 non-apoptotic caspase activation could be essential for regulating signalling events  
263 and cellular functions beyond apoptosis during development and adulthood<sup>1-4</sup>.

### 264 **Molecular basis of the caspase-dependent regulation of Hh-signalling and** 265 **autophagy**



266 At the molecular level, we show that sublethal levels of Dronc activation prevents the  
267 accumulation of Ptc receptor, and consequently alleviates its physiological inhibitory  
268 role on Hh-pathway (Fig. 5e). However, several factors suggest that Dronc is unlikely  
269 to directly cleave Ptc. First, there is no indication *in silico* that Ptc can be directly  
270 cleaved by Dronc. Second, the functional targets of Dronc in somatic cells appear to  
271 be the effector caspases (Fig. 2g). Third, the genetic interaction between *Dronc* and  
272 *ptc* is highly specific to the *Drosophila* germarium (e.g. both factors coexist in many  
273 other *Drosophila* tissues without any obvious signs of interaction). Therefore,  
274 although we provide the first mechanistic demonstration of the non-apoptotic  
275 interplay between caspases and Hh-signalling, unidentified molecular factors must  
276 couple their activities in ovarian somatic cells (Fig. 5e). Interestingly, it has been  
277 shown in mammalian cells that a set of ubiquitin ligases involved in the degradation  
278 of Ptc can also activate caspase-9 (*Dronc* mammalian homolog) and secondarily  
279 apoptosis in Hh-signalling deficient cells<sup>44, 45</sup>. However, it is unlikely that the  
280 equivalent *Drosophila* ubiquitin ligase (*smurf*) can explain our phenotypes since its  
281 expression and function are neither specific to the ovary or restricted to the Hh-  
282 pathway<sup>46</sup>. Nonetheless, our findings indicate that the crosstalk between caspases  
283 and Hh-signaling is more complex than anticipated, bidirectional and not specific to  
284 apoptosis.

285 Beyond modulating Hh-signalling and different cellular functions, Ptc aggregates in  
286 *Dronc* mutant cells can boost the autophagy levels (Fig. 4 and 5e). Although previous  
287 studies have associated *Dronc* with the regulation of autophagy<sup>47, 48</sup>, our findings  
288 establish the first molecular link between this cellular process, Hh-pathway and  
289 *Dronc*. In parallel, they also confirm the novel regulatory role of Ptc in the autophagy  
290 process<sup>17</sup>. Nevertheless, *Dronc* mutant phenotypes can be largely rescued by  
291 reactivating the Hh-pathway, and therefore the potential contribution of the  
292 autophagy to the *Dronc* phenotypes must be secondary. Interestingly, like in *Dronc*  
293 mutant cells, *caspase-9* deficiency appears to enhance the autophagy in human  
294 ovarian cells under moderate stress and induced-autophagy conditions (Fig. 5c and  
295 5d). Together, these results suggest that caspases are part of the evolutionary  
296 conserved genetic network regulating Hh-pathway and autophagy in ovarian somatic  
297 cells.

298 **Cellular, physiological and evolutionary implications of non-apoptotic caspase**  
299 **activation in ovarian somatic cells**

300 Our findings have shown the stereotyped presence of non-apoptotic caspase  
301 activation in somatic cells of the *Drosophila* ovary under physiological or moderate  
302 stress conditions. Indeed, this caspase activation appears to promote cell  
303 proliferation and differentiation in this context. Consequently, we propose that  
304 caspases are at the forefront of the cell survival mechanisms against cellular stress  
305 in ovarian somatic cells. Additionally, sustained caspase activation due to persistent  
306 signalling defects and/or environmental stress leads to apoptosis<sup>49</sup>. This dual role of  
307 caspases, coupled to different signalling pathways, could be an effective mechanism  
308 of signalling compensation and cellular selection in multiple cellular scenarios<sup>50</sup>.  
309 Future investigations are needed to unravel whether caspase activation to only  
310 sublethal thresholds is ensured via either specialised molecular mechanisms in  
311 specific subcellular localisations<sup>51</sup>, the strength of the activating cues, or a  
312 combination of both factors.

313 From a physiological perspective, it is well-described that Hh downregulation  
314 triggered by environmental stress restricts egg laying and promotes autophagy in  
315 *Drosophila*<sup>52-54</sup>. Similarly, Hh deregulation and/or exacerbated autophagy can  
316 compromise follicular development in mammalian systems<sup>55, 56</sup>. Our work suggests  
317 that sublethal caspase activation influences Hh-signalling and autophagy, and  
318 therefore it is also part of the complex adaptive system that ensures timely egg  
319 maturation.

320 Considering the described non-apoptotic roles of ancient members of the caspase  
321 family (metacaspases)<sup>4, 57, 58</sup>, our data may also have evolutionary implications. Since  
322 *Dronc* initially plays a pro-survival role in somatic cells, our results support the  
323 hypothesis that the primary role of caspases could be for sustaining basic cellular  
324 processes, and only inadvertent/persistent activation would lead to cell death<sup>57</sup>. In  
325 this view, these pro-apoptotic enzymes would primarily act as pro-survival factors,  
326 thus inverting the widely held view of their most primitive function. A greater  
327 understanding of the non-apoptotic roles of caspases is needed to test this  
328 hypothesis.

### 329 **Pathological and therapeutic consequences of caspase malfunction in ovarian** 330 **somatic cells**

331 Caspase activation can not only facilitate follicular development (our results), but also  
332 degeneration and follicular atresia in mammalian systems<sup>59</sup>. Therefore, caspase  
333 deregulation could compromise ovarian function through different mechanisms. On

334 one hand, caspase deficiency can alter the progression of follicular development by  
335 compromising the activation of key developmental signalling pathways such as Hh.  
336 On the other hand, it can prevent the natural degeneration of redundant follicles<sup>59</sup>.  
337 The combination of both effects can lead to ovarian failure, whilst creating tumour  
338 prone conditions. Furthermore, since the combined upregulation of Hh-signalling and  
339 autophagy is key to explaining the drug resistance of ovarian tumours<sup>60-62</sup>, caspase  
340 malfunctions acting upstream of these factors could compromise the success of  
341 therapeutic interventions. Paradoxically, our results also indicate that the therapeutic  
342 re-activation of caspases in the ovary also requires a careful calibration since  
343 sublethal caspase activation could promote the clonal expansion of somatic  
344 malignant cells. Collectively, these considerations illustrate some of the complexities  
345 of transferring caspase-modulating molecules into the clinic<sup>63</sup>.

## 346 MATERIAL AND METHODS

### 347 Fly Strains and fly husbandry details

348 All fly strains used are described at [www.flybase.bio.indiana.edu](http://www.flybase.bio.indiana.edu) unless otherwise  
349 indicated. After 24h of egg laying at 25°C, experimental specimens were raised at  
350 18°C, thus enabling the repression of Gal4 activity through a Gal80<sup>ts</sup>. This prevents  
351 potential lethality in most of our experimental conditions during larval and pupal  
352 stages. After hatching, adults were then transferred from 18°C to 29°C until the  
353 dissection time. At 29°C the repression of Gal80<sup>ts</sup> disappears, and therefore gene  
354 expression via Gal4 is elicited within specific cell subpopulations of the germarium.

355

### 356 Genotypes

357 Full description of experimental genotypes appearing in each figure.

### 358 Fig. 1

359 **1b.** *Actin DBS-S-QF, UAS-mCD8-GFP, QUAS-tomato-HA/+; QUAS-Gal4/+*

360 **1c and 1d.** *Actin DBS-S-QF, UAS-mCD8-GFP, QUAS-tomato-HA/+; QUAS-FLP*  
361 *(BL30126)/+; Actin5C FRT-stop-FRT lacZ-nls/+ (BL6355)*

362 **1f.** *w;; Dronc<sup>KO-Gal4</sup> / UAS-Histone-RFP (BL56555)*

363 **1g.** *UAS-FLP (BL4539) /+; Dronc<sup>KO-Gal4</sup> / Actin5C FRT-stop-FRT lacZ-nls (BL6355)*

364

### 365 Fig. 2

366 **2a and 2c,** left panel. *109-30Gal4 (BL7023)/+; Dronc<sup>KO</sup> Tub-G80<sup>ts</sup> (BL7019) /+.* The  
367 bars in 2b and 2d referring to this experiment are named as CTRL.

368 **2a** and **2c**, right panel. *109-30Gal4 (BL7023)/ QUAS-CD8-GFP (BL 30002); Dronc<sup>KO</sup>*  
369 *Tub-G80<sup>ts</sup> (BL7019) / UAS-Flp (BL8209) Dronc<sup>KO-FRT-Dronc-GFP-APEX-FRT-QF</sup>*. The bars in  
370 2b and 2d referring to this experiment are named as *Dronc -/-*.  
371 **2e** and **2f**, left panel. *spitz-Gal4 (NP0261)/+; Dronc<sup>KO</sup> Tub-G80<sup>ts</sup> (BL7019) / +*. The  
372 bars in 2b and 2d referring to this experiment are named as CTRL.  
373 **2e** and **2f**, right panel. *spitz-Gal4 (NP0261)/ QUAS-CD8-GFP (BL 30002); Dronc<sup>KO</sup>*  
374 *Tub-G80<sup>ts</sup> (BL7019) / UAS-Flp (BL8209) Dronc<sup>KO-FRT-Dronc-GFP-APEX-FRT-QF</sup>*. The bars in  
375 2b and 2d referring to this experiment are named as *Dronc -/-*.  
376 **2g**. First bar, *109-30Gal4 (BL7023)/ QUAS-CD8-GFP (BL 30002); Dronc<sup>KO</sup> Tub-*  
377 *G80<sup>ts</sup> (BL7019) / UAS-Flp (BL8209) Dronc<sup>KO-FRT Dronc-GFP-Apex FRT-Suntag-HA-Cherry</sup>*. Second  
378 bar, *109-30Gal4 (BL7023)/ QUAS-CD8-GFP (BL 30002); Dronc<sup>KO</sup> Tub-G80<sup>ts</sup>*  
379 *(BL7019) / UAS-Flp (BL8209) Dronc<sup>KO-FRT Dronc-GFP-Apex FRT-Dronc FL-CAEA-Suntag-HA-Cherry</sup>*. Third  
380 bar, *109-30Gal4 (BL7023)/UAS-DriceRNAi UAS-DecayRNAi (a gift from Pascal*  
381 *Meier); UAS-DammRNAi, UAS-Dcp1RNAi (a gift from Pascal Meier)*. Fourth bar;  
382 *109-30Gal4 (BL7023)/ UAS-RHG.miRNA (a gift from Iswar Hariharan)*  
383

### 384 **Fig. 3**

385 **3a.** *109-30Gal4 (BL7023)/ ptc-GFP<sup>CB02030</sup> (a gift from Isabel Guerrero)*  
386 **3b.** *109-30Gal4 (BL7023)/ ptc-GFP<sup>CB02030</sup> (a gift from Isabel Guerrero); Dronc<sup>KO</sup> Tub-*  
387 *G80<sup>ts</sup> (BL7019) / UAS-Flp (BL8209) Dronc<sup>KO-FRT-Dronc-GFP-APEX-FRT-QF</sup>*  
388 **3c.** *109-30Gal4 (BL7023)/UAS-smo<sup>Act</sup> (BL44621); Dronc<sup>KO</sup> Tub-G80<sup>ts</sup> (BL7019) / +*  
389 **3d.** *109-30Gal4 (BL7023)/UAS-smo<sup>Act</sup> (BL44621); Dronc<sup>KO</sup> Tub-G80<sup>ts</sup> (BL7019) /*  
390 *UAS-Flp (BL8209) Dronc<sup>KO-FRT-Dronc-GFP-APEX-FRT-QF</sup>*  
391 **3e.** First bar (*Dronc -/-*), *109-30Gal4 (BL7023)/+; Dronc<sup>KO</sup> Tub-G80<sup>ts</sup> (BL7019) / UAS-*  
392 *Flp (BL8209) Dronc<sup>KO-FRT-Dronc-GFP-APEX-FRT-QF</sup>*. Second bar (CTRL1), *109-30Gal4*  
393 *(BL7023)/UAS-Ci (BL32571); Dronc<sup>KO</sup> Tub-G80<sup>ts</sup> (BL7019)/+*. Third bar (*Dronc -/-*,  
394 *UAS-Ci*); *109-30Gal4 (BL7023)/UAS-Ci (BL32571); Dronc<sup>KO</sup> Tub-G80<sup>ts</sup> (BL7019) /*  
395 *UAS-Flp (BL8209) Dronc<sup>KO-FRT-Dronc-GFP-APEX-FRT-QF</sup>*. Fourth bar (CTRL2); *109-30Gal4*  
396 *(BL7023)/UAS-smo<sup>Act</sup> (BL44621); Dronc<sup>KO</sup> Tub-G80<sup>ts</sup> (BL7019) / +*. Fifth bar (*Dronc -*  
397 */-*, *UAS-smo<sup>Act</sup>*); *109-30Gal4 (BL7023)/UAS-smo<sup>Act</sup> (BL44621); Dronc<sup>KO</sup> Tub-G80<sup>ts</sup>*  
398 *(BL7019) / UAS-Flp (BL8209) Dronc<sup>KO-FRT-Dronc-GFP-APEX-FRT-QF</sup>*. The first and third bars  
399 are named in graph as CTRL, while the second and the fourth as *Dronc -/-*.  
400

### 401 **Fig. 4**

402 **4a** and **4d.** *ptc-Gal4<sup>559.1</sup> (BL2017)/+*  
403 **4b** and **4e.** *ptc-Gal4<sup>559.1</sup> (BL2017)/+; Dronc+/-*

404 **4c** and **4f**. First bar, *ptc-Gal4*<sup>559.1</sup> (*BL2017*)/+. Second bar, *ptc-Gal4*<sup>559.1</sup> (*BL2017*)/+;  
405 *Dronc*<sup>KO</sup> +/- . Third bar, *ptc-Gal4*<sup>559.1</sup> (*BL2017*)/ *QUAS-CD8-GFP* (*BL 30002*); *Dronc*<sup>KO</sup>  
406 *Tub-G80*<sup>ts</sup> (*BL7019*) / *UAS-Flp* (*BL8209*) *Dronc*<sup>KO-FRT-Dronc-GFP-APEX-FRT-QF</sup>  
407 **4g** and **4h**. *ptc-Gal4*<sup>559.1</sup> (*BL2017*)/ *QUAS-CD8-GFP* (*BL 30002*); *Dronc*<sup>KO</sup> *Tub-G80*<sup>ts</sup>  
408 (*BL7019*) / *UAS-Flp* (*BL8209*) *Dronc*<sup>KO-FRT-Dronc-GFP-APEX-FRT-QF</sup>  
409 **4i-l**. First bar, *Dronc*<sup>KO</sup>/+. Second bar, *ptc-Gal4*<sup>559.1</sup> (*BL2017*)/ +. Third bar, *ptc-*  
410 *Gal4*<sup>559.1</sup> (*BL2017*)/ + ; *Dronc*<sup>KO</sup>/+

411

412

413

#### 414 **Immunohistochemistry**

415 Adult *Drosophila* ovaries were dissected on ice-cold PBS. Immunostainings and  
416 washes were performed according to standard protocols (fixing in PBS 4%  
417 paraformaldehyde, washing in PBT 0.3% (0.3% Triton X-100 in PBS). Primary  
418 antibodies used in our experiments were: anti-Castor (1:2000; a gift from Alex  
419 Gould); rabbit anti-HA (1:1000; Cell Signaling C29F4); mouse anti-betaGal (1:500;  
420 Promega Z378B); chicken Anti-βGal (1:200, Abcam AB9361); Anti-FasIII (1:75,  
421 Hybridoma Bank 7G10); Anti-Orb (1:75, Hybridoma Bank 4H8), Anti-Ci-155-full  
422 length (1:50, Hybridoma Bank 2A1); Anti-Ptc (1:50, Hybridoma Bank Apa1); Anti-  
423 Ref2P (1:300, abcam 178440). Conjugated secondary antibodies (Molecular Probes)  
424 were diluted in 0.3% PBT and used in a final concentration (1:200): conjugated  
425 donkey anti-rabbit Alexa-Fluor- 488 (A21206) or 555 (A31572) or 647 (A31573),  
426 conjugated donkey anti-mouse Alexa-Fluor-488 (A21202) or 555 (A31570) or 647  
427 (A31571), conjugated goat anti-rat Life Technologies (Paisley, UK) Alexa-Fluor- 488  
428 (A21247) or 555 (A21434). DAPI was added to the solution with the secondary  
429 antibodies for labelling the nuclei (1:1000; Thermo Scientific 62248). Following  
430 incubation in secondary antibodies, samples were washed several times during 60  
431 minutes in PBT. Finally, they were mounted on Poly-Prep Slides (P0425-72EA,  
432 Sigma) in Aqua-Poly/Mount (Polysciences, Inc (18606)).

433

#### 434 **TUNEL staining**

435 Like in the immunochemistry, follicles from adult *Drosophila* females were dissected  
436 in ice-cold PBS and fixed in PBS containing 4% formaldehyde for 20'. After fixation,  
437 the samples were washed 3 times for 15' with PBS and subsequently permeabilised  
438 with PBS containing 0,3% triton and 0,1% sodium citrate for 8' on ice. 3 PBS washes  
439 for 20' with were performed also after permeabilisation. The *in situ* detection of  
440 fragmented genomic DNA was performed according to the DeadEnd colorimetric

441 TUNEL (Terminal transferase-mediated dUTP nick-end labeling) system (Promega).  
442 Briefly, samples were first equilibrated at room temperature in equilibration buffer (5-  
443 10') and then incubated with TdT reaction mix for 1 hour at 37°C in a humidified  
444 chamber to obtain the 3'-end labelling of fragmented DNA. The reaction was  
445 terminated with 3 washes for 15' in PBS. If necessary, the TUNEL protocol was  
446 followed by standard immunofluorescent staining. The detection of TUNEL-positive  
447 cells was achieved by an incubation of 45' with streptavidin-fluorophore conjugated  
448 dyes.

449

#### 450 **Imaging of fixed and live samples**

451 *Drosophila* ovarioles were imaged using the Olympus Fluoview FV1200 and  
452 associated software. Z-stacks were taken with a 40X objective at intervals along the  
453 apical-basal axis that ensured adequate resolution along Z-axis (step size 0.5-1.5-  
454 µm). The same confocal settings were used during the image acquisition process of  
455 experimental and control samples. Acquired images were processed using ImageJ  
456 1.52n software<sup>64</sup> and Adobe Photoshop CC in order to complete the figure  
457 preparation.

458

#### 459 **Image quantification**

460 All of the images used in this study were randomised and blindly scored during the  
461 quantification process. Images for quantification purposes were processed with  
462 ImageJ 1.52n. To estimate the percentage of germaria showing Castor expression  
463 defects (Fig 2b, 2g, 3e, 4c and Suppl Fig 2c, 3e), we first projected at least 8 focal  
464 planes (maximum projection plug-in included in ImageJ) containing the follicular cells  
465 of region 2b forming the arch-like structure around the germline. The germaria were  
466 considered mutant for Castor if showing more than two follicular cells negative for  
467 this gene in the 2b region.

468 In all other quantifications, all of the focal planes of each ovariole were first merged  
469 using the maximum projection plug-in included in ImageJ. The relative area of the  
470 germaria occupied by Orb-expressing cells (Fig 2d, 4f) was estimated as follows.  
471 First, we delimited with the freehand selection tool of ImageJ the area occupied by  
472 Orb-expressing cells and subsequently, we used the corresponding plugin of the  
473 software to estimate the area. Following the same workflow, we next estimate the  
474 total area of the germarium. The value of area of Orb-expressing cells was finally  
475 divided by the total area of the germaria.

476 After applying the thresholding and “Analyse Particles” plug-in from ImageJ, we  
477 quantified the number and size of Ptc and Ref2P-positive particles in the regions 1,  
478 2a and 2b of the germarium (Fig 4i, 4k, Supp Fig 3b).  
479 The “mean grey value” of the GFP channel in regions 1, 2a and 2b of the germaria  
480 was used to estimate the intensity of GFP signal derived from the *ptc*-GFP transgene  
481 (Supp Fig 2d).

482

483

#### 484 **Western Blot**

485 Adult *Drosophila* ovaries were dissected in ice-cold PBS and snap-frozen in liquid  
486 nitrogen. Subsequently, they were homogenised in NP40 buffer [150 mM NaCl, 50  
487 mM Tris-HCl pH 7.5, 5% glycerol, 1% IGEPAL CA-630]. Cells were harvested using  
488 trypsin/EDTA and centrifuged at 300g for 5'. Pellets were washed in PBS and then  
489 treated with RIPA lysis buffer 1x [150 mM NaCl, 50 mM Tris-HCl pH 7.5, 0.1 mM  
490 EGTA, 0,5 mM EDTA, 1% Triton X-100]. Halt Protease and Phosphatase Inhibitor  
491 Cocktail (Thermo Scientific Pierce) and Benzonase (BaseMuncher, Expedeon) were  
492 added according to the manufacturer's instructions. Protein content was determined  
493 using Bradford reagent (Bio-Rad). Extracts were mixed with NuPAGE LDS Sample  
494 Buffer and separated by SDS-PAGE. For performing the SDS-PAGE electrophoresis,  
495 lysates were loaded and run in NuPAGE Bis-Tris Gels in NuPAGE MOPS SDS  
496 Running Buffer (Thermofisher Scientific). Protein blot transfers were performed using  
497 Trans-Blot Turbo Transfer System (Biorad). Nitrocellulose blots were incubated at  
498 room temperature for 30' in blocking buffer [Tris-buffered saline with 0.1% Tween  
499 containing 5% non-fat dried milk] and then incubated overnight at 4°C in the same  
500 blocking solution with the corresponding antibodies. After washing three times for 15'  
501 each with Tris-buffered saline containing 0.1% Tween, the blots were incubated with  
502 horseradish peroxidase-conjugated (HRP) IgG, followed by washing.  
503 Immunoreactive bands were detected using the SuperSignal West Pico PLUS  
504 Chemiluminescent Substrate (Thermofisher Scientific). Developed CL-XPosure films  
505 (Thermofisher Scientific) were scanned using a flat-bed scanner and the density of  
506 the bands was measured using Gel Analyzer plugin in ImageJ software. Primary  
507 antibodies used: Anti-Ptc (1:500, Hybridoma Bank Apa1); Anti-Ref2P (1:500, abcam  
508 178440); Anti-Actin (1:500, Hybridoma Bank JLA20s); Anti-Ci-155-full length (1:500,  
509 Hybridoma Bank 2A1); Anti-Caspase-9 (C9) (1:1000, Cell Signalling 9508); Anti-β-  
510 Actin-Peroxidase (1:20000, Sigma A3854), Anti SQSTM1 / P62 antibody (1:5000,  
511 GeneTex GTX111393).

512

513 **Cell culture mammalian cells**

514 OVCAR-3 cells were maintained in RPMI (Sigma, R8758), supplemented with 10%  
515 FBS (Life Technologies, 10500064) and grown at 37°C in a humidified atmosphere  
516 with 5% CO<sub>2</sub>. For the experiment shown in Figure 5c and 5d, we replaced the media  
517 with fresh media containing either EtOH (0.2%) or EtOH (0.2%) + the inhibitor of  
518 autophagy bafilomycin A1 (400nM, Merck Chemicals). Cells were grown in these two  
519 different cell culture media during the last 4 hours previous the sample processing.

520

521 **RNA interference**

522 Small interfering RNA (siRNA) specific for Caspase-9 (ON-TARGETplus SMART  
523 pool human L-003309-00-0005, 842), PTCH1 (ON-TARGETplus Human PTCH1, L-  
524 003924-00-0005, 5727) and non-targeting controls (ON-TARGET plus Non-targeting  
525 Pool, D-001810-10-05) were purchased from Dharmacon Inc. (UK). Cells were  
526 plated and transfected the day after with Oligofectamine™ Transfection Reagent  
527 (Thermofisher 12252) in the presence of siRNAs according to the manufacturer's  
528 instructions. Cells were kept in the transfection mix before processing for western  
529 blot or Q-PCR at the specified time points (24h and 72h).

530

531 **Gene expression analyses by Q-PCR.**

532 RNA extraction was performed using the Qiagen RNeasy Plus kit (74034). cDNAs  
533 were synthesised with Maxima First Strand cDNA synthesis kit (Molecular Biology,  
534 Thermofisher, K1642) Q-PCR were performed using QuantiNova SYBR Green PCR  
535 Kit (Qiagen, 208054). Detection was performed using Rotor-Gene Q Real-time PCR  
536 cyclers (Qiagen).

537 Data was analysed using the Pfaffl method, based on  $\Delta\Delta$ -Ct and normalised to actin  
538 as the housekeeping gene.

539 Gene expression was estimated with the following primers:

540 Patched1: Forward CCACGACAAAGCCGACTACAT; Reverse GCTGCAGATGGTCCTTACTTTTTC

541 B-actin: Forward CCTGGCACCCAGCACAAT; Reverse GGGCCGGACTCGTCATAC.

542

543 **FIGURE LEGENDS:**

544 **Fig. 1 Non-apoptotic caspase activation in the somatic cells of the *Drosophila***  
545 **germarium.**

546 **a**, Schematic drawing of the *Drosophila* germarium. Somatic cells relevant for this  
547 study (escort, follicular stem and follicular) are depicted in different colours; germline



548 cells are in white. **b**, Representative confocal image of past (green channel, arrows)  
549 and present (red channel) caspase activation in somatic cells using the DBS-S-QF  
550 sensor; TUNEL staining indicates apoptosis (grey channel). **c**, Representative  
551 confocal image of escort and follicular somatic cells permanently labelled with DBS-  
552 S-QF sensor (green channel, arrows); the arrowhead indicates the presence of  
553 apoptotic germline cells (red channel, TUNEL staining). Notice the lack of TUNEL  
554 signal in DBS-S-QF positive cells in **c**. **d**, Graph bar indicating the percentage of  
555 ovarioles permanently labelled with DBS-S-QF sensor at 7 and 14 days; flies were  
556 raised at 18°C until eclosion, then shifted to 29°C until the dissection time. **e**,  
557 Graphical representation of the *Dronc*<sup>KO-Gal4</sup> expression pattern in the germarium;  
558 cells transcribing *Dronc* are coloured in red. **f**, Representative example of somatic  
559 cells in the germarium expressing Histone-RFP (red channel) under the regulation of  
560 *Dronc*<sup>KO-Gal4</sup> at 29 °C; the follicular maker Castor is shown in green. **g**, Representative  
561 example of a cell lineage-tracing experiment conducted using *Dronc*<sup>KO-Gal4</sup>; notice the  
562 presence of *Dronc* expressing cells in the escort cell territory and the region 2b of the  
563 germarium (green channel shows anti-Bgal staining). Follicular somatic cells are  
564 labelled with anti-FasIII (red channel in **g**). Dapi staining labels the nuclei (blue  
565 channel) in all the confocal images. Please see full genotype description in the MM  
566 section. Scale bars represents 10 µm.

567 **Fig. 2 Phenotype characterisation of caspase loss-of-function in the**  
568 ***Drosophila* germarium.**

569 **a**, Confocal image comparing the expression of the follicular cell marker Castor (red  
570 and grey channels) in either heterozygous (left side of the white dotted line) or  
571 homozygous *Dronc* mutant follicular cells (right side) generated using 109-30-Gal4;  
572 notice the downregulation of Castor in the mutant condition (arrow). GFP signal  
573 labels *Dronc*-transcribing cells (green channel, QUAS-CD8-GFP) after preferentially  
574 excising the *Dronc* FRT-rescue-cassette in the follicular stem cells and their progeny  
575 (region 2b of the germarium) using the 109-30-Gal4 driver. Dapi labels the nuclei in  
576 **a**, **c**, **e**, and **f**, respectively. **b**, Cumulative percentage of Castor-deficient germaria in  
577 either heterozygous or homozygous *Dronc* mutant cells using different Gal4 drivers  
578 (109-30, *spitz*, and *c587*); the n number for each column in order of appearance  
579 n=16, n=17, n=20, n=15, n=34, n=19. **c**, Orb expression (red and grey channels) in a  
580 heterozygous (left side) or homozygous *Dronc* mutant background (right side); *Dronc*  
581 expression was targeted in the follicular stem cells and their progeny (region 2b of  
582 the germarium) using 109-30-Gal4. **d**, Relative area occupied by Orb-expressing

583 cells; Gal4 drivers used were 109-30, *spitz*, and *c587*; n=12, n=20, n=17, n=17,  
584 n=18, n=6; statistical significance was established by using an ordinary Unpaired T-  
585 test (\*  $p \leq 0.05$ , \*\*  $p \leq 0.01$ , \*\*\* $p \leq 0.001$ ). **e** and **f**, Castor and Orb expression in a  
586 heterozygous (left side) or homozygous *Dronc* mutant escort cells (right side) (red  
587 and grey channels in **e** and **f**, respectively) generated using *spitz*-Gal4. **g**,  
588 Percentage of Castor-deficient germaria after compromising the expression of *Dronc*  
589 (first bar, n=11, *Dronc* *suntag*-HA-Cherry/-), the activation of *Dronc* (second bar,  
590 n=15, *Dronc*-FL-CAEA /-), the expression of all of the effector caspases (third bar,  
591 n=16, UAS-RNAi) and the expression of proapoptotic factors (fourth bar, n=9,  
592 microRNA against the major pro-apoptotic factors *hid*, *grim* and *reaper*). Full  
593 genotype description in the MM section. Scale bars represents 10  $\mu\text{m}$ .

594 **Fig. 3 The loss-of function of *Dronc* causes Hh-signalling defects.**

595 **a** and **b**, Representative confocal image showing the expression of Ci-155 (blue and  
596 grey channels), *ptc*-GFP (*ptc*-GFP is a *bona-fide* transcriptional read out of Hh-  
597 pathway<sup>65</sup>; green and grey channels) and Castor (red and grey channels) in either a  
598 control (**a**) or a *Dronc* mutant germarium (**b**); notice the downregulation of *Ci* and *ptc*-  
599 GFP expression. **c**, Castor expression (red and grey channels) in follicular cells  
600 heterozygous for *Dronc* expressing a constitutively active form of *smo* under the  
601 regulation of 109-30-Gal4 driver. **d**, Castor expression (red and grey channels) in  
602 follicular cells homozygous for *Dronc* expressing a constitutively active form of *smo*  
603 under the regulation of 109-30-Gal4 driver; notice that castor is not downregulated  
604 (compare with Fig.2). Dapi staining labels the nuclei in **c** and **d**. **e**, Cumulative  
605 percentage of Castor-deficient germaria after expressing Ci or Smo-activated under  
606 the regulation of 109-30-Gal4 in either heterozygous or homozygous *Dronc* follicular  
607 mutant cells; the n number for each column in order of appearance n=21, n=8, n=24,  
608 n=11, n=8. Full genotype description in the MM section. Scale bars represents 10  
609  $\mu\text{m}$ .

610 **Fig. 4 *Dronc* modulates Hh-signalling and autophagy through the fine**  
611 **regulation of Ptc protein levels.**

612 **a** and **b**. Castor expression (red and grey channels) in either a *ptc* heterozygous  
613 germarium (**a**) or double heterozygous *ptc*-*Dronc* (**b**); notice the downregulation of  
614 Castor in **b**. Dapi staining (blue channel) labels the nuclei in all the confocal images  
615 of the figure. **c**, Cumulative percentage of Castor-deficient germaria in the genetic  
616 conditions indicated in the graph; the n number for each column in order of

617 appearance n=20, n=25, n=20. **d** and **e**, Orb expression (red and grey channels) in  
618 either a *ptc* heterozygous germarium (d) or double heterozygous *ptc-Dronc* (e). **f**,  
619 Relative area occupied by Orb-expressing cells in the genetic conditions indicated in  
620 the graph, an ordinary one-way ANOVA Tukey's multiple comparisons test was used  
621 to establish the statistical significance (\*\* $p \leq 0.001$ , \*\*\*\* $p \leq 0.0001$ ). **g** and **h**, Castor  
622 (red and grey channels in g) and Orb (red and grey channels in h) expression in *ptc*  
623 heterozygous-*Dronc* fully mutant germaria; notice the downregulation of Castor (g)  
624 and the accumulation of Orb-expressing cells (h). *Dronc*-transcribing cells are  
625 labelled with GFP (green channel, QUAS-CD8-GFP) upon excision in the escort and  
626 the follicular cells of the *Dronc* FRT-rescue-cassette using the *ptc*-Gal4 driver. **i**,  
627 Relative number of Ptc positive particles per germaria; notice the increased number  
628 of Ptc particles in double heterozygous germaria (*ptc-Gal4/+;Dronc +/-*), an ordinary  
629 one-way ANOVA Tukey's multiple comparisons test was used to establish the  
630 statistical significance (\*\* $p \leq 0.001$ ). **j**, Western blot showing Ptc (upper lane) and  
631 Actin (bottom lane, loading control) in different genetic mutant backgrounds; notice  
632 the Ptc accumulation in double heterozygous germaria (*ptc-Gal4/+;Dronc +/-*). **k**,  
633 Relative number of the Ref2P positive particles per germaria; notice the reduction in  
634 the number of Ref2P particles in double heterozygous germaria (*ptc-Gal4/+;Dronc*  
635 *+/-*) compared to the (*ptc-Gal4/+*) control; an ordinary one-way ANOVA Tukey's  
636 multiple comparisons test was used to establish the statistical significance (\*\* $p \leq 0.01$ ,  
637 \*\*\*\* $p \leq 0.0001$ ). **l**, Western blot showing Ref2P (upper lane) and Actin (bottom lane) in  
638 different genetic mutant backgrounds; notice the Ref2P reduction in double  
639 heterozygous germaria (*ptc-Gal4/+;Dronc +/-*) compared to the (*ptc-Gal4/+*) control.  
640 Full genotype description in the MM section. Scale bars represents 10  $\mu\text{m}$ .

641 **Fig. 5 The non-apoptotic caspase effects in Hh-signalling and autophagy are**  
642 **evolutionarily conserved in ovarian somatic cells with human origin.**

643 **a**, Western blot showing caspase-9 expression (upper lane) and Actin (bottom lane,  
644 loading control) in either control or Caspase-9 mutant OVCAR-3 cells (24h and 72h  
645 post-transfection of an shRNA against Caspase-9; notice the strong downregulation  
646 of Caspase-9 at 72h. **b**, mRNA levels of *ptc* measured by Q-PCR in either control or  
647 Caspase-9 mutant OVCAR-3 cells; notice the strong downregulation of *ptc*  
648 expression in the Caspase-9 mutant cells at 72h; an ordinary Mann Whitney  
649 unpaired T-test was used to establish the statistical significance (\*\* $p \leq 0.01$ ). **c**,  
650 Western blot showing the expression levels of the autophagy marker p62 (upper  
651 lane), Caspase-9 (middle lane) and Actin (bottom lane, loading control) in either

652 scrambled or caspase-9 mutant OVCAR-3 cells; the protein levels of the different  
653 read outs were measured at 72h after siRNA treatment in cells grown during the last  
654 4 h before sample processing in our standard cell culture conditions, in cell culture  
655 media containing EtOH (0.2%), and in cell culture media containing EtOH (0.2%) +  
656 bafilomycin A1 (400nM). **d**, Quantification of p62 protein levels in the experimental  
657 conditions described in d; notice the downregulation of p62 in EtOH treated cells  
658 deficient in Caspase-9 (one sample T Wilcoxon test was used to calculate statistical  
659 significance, \*  $p \leq 0.05$ ,  $n \geq 3$ . **e**, Model summarising the non-apoptotic effects of  
660 caspases in ovarian somatic cells with human origin. Green colour, big font and plus  
661 symbol (+) indicate activation, while red colour, small font and negative symbol (-)  
662 reflect downregulation. The cellular consequences of caspase activation/deficiency  
663 are indicated as Cellular Effects.

664

## 665 REFERENCES

- 666 1. Aram, L., Yacobi-Sharon, K. & Arama, E. CDPs: caspase-dependent non-  
667 lethal cellular processes. *Cell Death Differ* **24**, 1307-1310 (2017).
- 668 2. Baena-Lopez, L.A. All about the caspase-dependent functions without cell  
669 death. *Semin Cell Dev Biol* (2018).
- 670 3. Burgon, P.G. & Megeney, L.A. Caspase signaling, a conserved inductive cue  
671 for metazoan cell differentiation. *Semin Cell Dev Biol* (2017).
- 672 4. Bell, R.A.V. & Megeney, L.A. Evolution of caspase-mediated cell death and  
673 differentiation: twins separated at birth. *Cell Death Differ* **24**, 1359-1368  
674 (2017).
- 675 5. Kirilly, D. & Xie, T. The Drosophila ovary: an active stem cell community.  
676 *Cell Res* **17**, 15-25 (2007).
- 677 6. Losick, V.P., Morris, L.X., Fox, D.T. & Spradling, A. Drosophila stem cell  
678 niches: a decade of discovery suggests a unified view of stem cell  
679 regulation. *Dev Cell* **21**, 159-171 (2011).
- 680 7. Tang, H.L., Tang, H.M., Fung, M.C. & Hardwick, J.M. In vivo CaspaseTracker  
681 biosensor system for detecting anastasis and non-apoptotic caspase  
682 activity. *Sci Rep* **5**, 9015 (2015).
- 683 8. Huang, J. & Kalderon, D. Coupling of Hedgehog and Hippo pathways  
684 promotes stem cell maintenance by stimulating proliferation. *J Cell Biol*  
685 **205**, 325-338 (2014).
- 686 9. Huang, J., Reilein, A. & Kalderon, D. Yorkie and Hedgehog independently  
687 restrict BMP production in escort cells to permit germline differentiation  
688 in the Drosophila ovary. *Development* **144**, 2584-2594 (2017).
- 689 10. Vied, C. & Kalderon, D. Hedgehog-stimulated stem cells depend on non-  
690 canonical activity of the Notch co-activator Mastermind. *Development*  
691 **136**, 2177-2186 (2009).
- 692 11. Zhang, Y. & Kalderon, D. Hedgehog acts as a somatic stem cell factor in the  
693 Drosophila ovary. *Nature* **410**, 599-604 (2001).
- 694 12. Rojas-Rios, P., Guerrero, I. & Gonzalez-Reyes, A. Cytoneme-mediated  
695 delivery of hedgehog regulates the expression of bone morphogenetic

- 696 proteins to maintain germline stem cells in *Drosophila*. *PLoS Biol* **10**,  
697 e1001298 (2012).
- 698 13. Sahai-Hernandez, P. & Nystul, T.G. A dynamic population of stromal cells  
699 contributes to the follicle stem cell niche in the *Drosophila* ovary.  
700 *Development* **140**, 4490-4498 (2013).
- 701 14. Chang, Y.C., Jang, A.C., Lin, C.H. & Montell, D.J. Castor is required for  
702 Hedgehog-dependent cell-fate specification and follicle stem cell  
703 maintenance in *Drosophila* oogenesis. *Proc Natl Acad Sci U S A* **110**,  
704 E1734-1742 (2013).
- 705 15. Briscoe, J. & Therond, P.P. The mechanisms of Hedgehog signalling and its  
706 roles in development and disease. *Nat Rev Mol Cell Biol* **14**, 416-429  
707 (2013).
- 708 16. Dai, W., Peterson, A., Kenney, T., Burrous, H. & Montell, D.J. Quantitative  
709 microscopy of the *Drosophila* ovary shows multiple niche signals specify  
710 progenitor cell fate. *Nat Commun* **8**, 1244 (2017).
- 711 17. Singh, T., Lee, E.H., Hartman, T.R., Ruiz-Whalen, D.M. & O'Reilly, A.M.  
712 Opposing Action of Hedgehog and Insulin Signaling Balances Proliferation  
713 and Autophagy to Determine Follicle Stem Cell Lifespan. *Dev Cell* **46**, 720-  
714 734 e726 (2018).
- 715 18. Rosales-Nieves, A.E. & Gonzalez-Reyes, A. Genetics and mechanisms of  
716 ovarian cancer: parallels between *Drosophila* and humans. *Semin Cell Dev*  
717 *Biol* **28**, 104-109 (2014).
- 718 19. Szkandera, J., Kiesslich, T., Haybaeck, J., Gerger, A. & Pichler, M. Hedgehog  
719 signaling pathway in ovarian cancer. *Int J Mol Sci* **14**, 1179-1196 (2013).
- 720 20. Zeng, C., Chen, T., Zhang, Y. & Chen, Q. Hedgehog signaling pathway  
721 regulates ovarian cancer invasion and migration via adhesion molecule  
722 CD24. *J Cancer* **8**, 786-792 (2017).
- 723 21. Ray, A., Meng, E., Reed, E., Shevde, L.A. & Rocconi, R.P. Hedgehog signaling  
724 pathway regulates the growth of ovarian cancer spheroid forming cells.  
725 *Int J Oncol* **39**, 797-804 (2011).
- 726 22. Li, H., Li, J. & Feng, L. Hedgehog signaling pathway as a therapeutic target  
727 for ovarian cancer. *Cancer Epidemiol* **40**, 152-157 (2016).
- 728 23. Baena-Lopez, L.A. *et al.* Apical caspase reporters uncover unknown stages  
729 of apoptosis and enable ready visualization of undead cells. (2018).
- 730 24. Arthurton, L., Nahotko, D., Alonso, J. & Baena-Lopez, L.A. Non-apoptotic  
731 caspase-dependent regulation of enteroblast quiescence in *Drosophila*.  
732 *bioRxiv* (2019).
- 733 25. Baena-Lopez, L.A., Alexandre, C., Mitchell, A., Pasakarnis, L. & Vincent, J.P.  
734 Accelerated homologous recombination and subsequent genome  
735 modification in *Drosophila*. *Development* **140**, 4818-4825 (2013).
- 736 26. Jin, Z., Flynt, A.S. & Lai, E.C. *Drosophila* piwi mutants exhibit germline  
737 stem cell tumors that are sustained by elevated Dpp signaling. *Curr Biol*  
738 **23**, 1442-1448 (2013).
- 739 27. Napoletano, F. *et al.* p53-dependent programmed necrosis controls germ  
740 cell homeostasis during spermatogenesis. *PLoS Genet* **13**, e1007024  
741 (2017).
- 742 28. Ouyang, Y. *et al.* Dronc caspase exerts a non-apoptotic function to restrain  
743 phospho-Numb-induced ectopic neuroblast formation in *Drosophila*.  
744 *Development* **138**, 2185-2196 (2011).

- 745 29. Muro, I., Monser, K. & Clem, R.J. Mechanism of Dronc activation in  
746 *Drosophila* cells. *J Cell Sci* **117**, 5035-5041 (2004).
- 747 30. Chai, J. *et al.* Molecular mechanism of Reaper-Grim-Hid-mediated  
748 suppression of DIAP1-dependent Dronc ubiquitination. *Nat Struct Biol* **10**,  
749 892-898 (2003).
- 750 31. Leulier, F. *et al.* Systematic in vivo RNAi analysis of putative components  
751 of the *Drosophila* cell death machinery. *Cell Death Differ* **13**, 1663-1674  
752 (2006).
- 753 32. Xu, D. *et al.* The effector caspases drICE and dcp-1 have partially  
754 overlapping functions in the apoptotic pathway in *Drosophila*. *Cell Death*  
755 *Differ* **13**, 1697-1706 (2006).
- 756 33. Siegrist, S.E., Haque, N.S., Chen, C.H., Hay, B.A. & Hariharan, I.K.  
757 Inactivation of both Foxo and reaper promotes long-term adult  
758 neurogenesis in *Drosophila*. *Curr Biol* **20**, 643-648 (2010).
- 759 34. Motzny, C.K. & Holmgren, R. The *Drosophila cubitus interruptus* protein  
760 and its role in the wingless and hedgehog signal transduction pathways.  
761 *Mech Dev* **52**, 137-150 (1995).
- 762 35. Shyamala, B.V. & Bhat, K.M. A positive role for patched-smoothened  
763 signaling in promoting cell proliferation during normal head development  
764 in *Drosophila*. *Development* **129**, 1839-1847 (2002).
- 765 36. Jimenez-Sanchez, M. *et al.* The Hedgehog signalling pathway regulates  
766 autophagy. *Nat Commun* **3**, 1200 (2012).
- 767 37. Bjorkoy, G. *et al.* Monitoring autophagic degradation of p62/SQSTM1.  
768 *Methods Enzymol* **452**, 181-197 (2009).
- 769 38. Bhattacharya, R. *et al.* Role of hedgehog signaling in ovarian cancer. *Clin*  
770 *Cancer Res* **14**, 7659-7666 (2008).
- 771 39. Liao, X. *et al.* Aberrant activation of hedgehog signaling pathway in  
772 ovarian cancers: effect on prognosis, cell invasion and differentiation.  
773 *Carcinogenesis* **30**, 131-140 (2009).
- 774 40. Li, Y., Wang, S., Ni, H.M., Huang, H. & Ding, W.X. Autophagy in alcohol-  
775 induced multiorgan injury: mechanisms and potential therapeutic targets.  
776 *Biomed Res Int* **2014**, 498491 (2014).
- 777 41. Mauvezin, C. & Neufeld, T.P. Bafilomycin A1 disrupts autophagic flux by  
778 inhibiting both V-ATPase-dependent acidification and Ca-P60A/SERCA-  
779 dependent autophagosome-lysosome fusion. *Autophagy* **11**, 1437-1438  
780 (2015).
- 781 42. Ding, A.X. *et al.* CasExpress reveals widespread and diverse patterns of  
782 cell survival of caspase-3 activation during development in vivo. *Elife* **5**  
783 (2016).
- 784 43. Sun, G. *et al.* A molecular signature for anastasis, recovery from the brink  
785 of apoptotic cell death. *J Cell Biol* **216**, 3355-3368 (2017).
- 786 44. Mille, F. *et al.* The Patched dependence receptor triggers apoptosis  
787 through a DRAL-caspase-9 complex. *Nat Cell Biol* **11**, 739-746 (2009).
- 788 45. Fombonne, J. *et al.* Patched dependence receptor triggers apoptosis  
789 through ubiquitination of caspase-9. *Proc Natl Acad Sci U S A* **109**, 10510-  
790 10515 (2012).
- 791 46. Liang, Y.Y. *et al.* dSmurf selectively degrades DPP-activated MAD and its  
792 overexpression disrupts imaginal disc development. *J Biol Chem* (2003).

- 793 47. Martin, D.N. & Baehrecke, E.H. Caspases function in autophagic  
794 programmed cell death in *Drosophila*. *Development* **131**, 275-284 (2004).
- 795 48. Daish, T.J., Mills, K. & Kumar, S. *Drosophila* caspase DRONC is required for  
796 specific developmental cell death pathways and stress-induced apoptosis.  
797 *Dev Cell* **7**, 909-915 (2004).
- 798 49. Fadeel, B. & Orrenius, S. Apoptosis: a basic biological phenomenon with  
799 wide-ranging implications in human disease. *J Intern Med* **258**, 479-517  
800 (2005).
- 801 50. Moreno, E., Basler, K. & Morata, G. Cells compete for decapentaplegic  
802 survival factor to prevent apoptosis in *Drosophila* wing development.  
803 *Nature* **416**, 755-759 (2002).
- 804 51. Williams, D.W. & Truman, J.W. Remodeling dendrites during insect  
805 metamorphosis. *Journal of neurobiology* **64**, 24-33 (2005).
- 806 52. Huey, R.B., Wakefield, T., Crill, W.D. & Gilchrist, G.W. Within- and between-  
807 generation effects of temperature on early fecundity of *Drosophila*  
808 *melanogaster*. *Heredity (Edinb)* **74 (Pt 2)**, 216-223 (1995).
- 809 53. Terashima, J. & Bownes, M. Translating available food into the number of  
810 eggs laid by *Drosophila melanogaster*. *Genetics* **167**, 1711-1719 (2004).
- 811 54. Terashima, J., Takaki, K., Sakurai, S. & Bownes, M. Nutritional status  
812 affects 20-hydroxyecdysone concentration and progression of oogenesis  
813 in *Drosophila melanogaster*. *J Endocrinol* **187**, 69-79 (2005).
- 814 55. Pepling, M.E. Hedgehog signaling in follicle development. *Biol Reprod* **86**,  
815 173 (2012).
- 816 56. Zhou, J., Peng, X. & Mei, S. Autophagy in Ovarian Follicular Development  
817 and Atresia. *Int J Biol Sci* **15**, 726-737 (2019).
- 818 57. Dick, S.A. & Megeney, L.A. Cell death proteins: an evolutionary role in  
819 cellular adaptation before the advent of apoptosis. *Bioessays* **35**, 974-983  
820 (2013).
- 821 58. Lee, R.E., Brunette, S., Puente, L.G. & Megeney, L.A. Metacaspase Yca1 is  
822 required for clearance of insoluble protein aggregates. *Proc Natl Acad Sci*  
823 *U S A* **107**, 13348-13353 (2010).
- 824 59. Hurst, P.R., Mora, J.M. & Fenwick, M.A. Caspase-3, TUNEL and  
825 ultrastructural studies of small follicles in adult human ovarian biopsies.  
826 *Hum Reprod* **21**, 1974-1980 (2006).
- 827 60. Zeng, X. & Ju, D. Hedgehog Signaling Pathway and Autophagy in Cancer.  
828 *Int J Mol Sci* **19** (2018).
- 829 61. Song, X. *et al.* Activation of hedgehog signaling and its association with  
830 cisplatin resistance in ovarian epithelial tumors. *Oncol Lett* **15**, 5569-5576  
831 (2018).
- 832 62. Zhu, L. *et al.* Autophagy is a pro-survival mechanism in ovarian cancer  
833 against the apoptotic effects of euxanthone. *Biomed Pharmacother* **103**,  
834 708-718 (2018).
- 835 63. Yang, C. & Novack, D.V. Anti-cancer IAP antagonists promote bone  
836 metastasis: a cautionary tale. *J Bone Miner Metab* **31**, 496-506 (2013).
- 837 64. Schneider, C.A., Rasband, W.S. & Eliceiri, K.W. NIH Image to ImageJ: 25  
838 years of image analysis. *Nat Methods* **9**, 671-675 (2012).
- 839 65. Buszczak, M. *et al.* The carnegie protein trap library: a versatile tool for  
840 *Drosophila* developmental studies. *Genetics* **175**, 1505-1531 (2007).
- 841

842

843

844



845 **CONTRIBUTIONS**

846 L.A.B-L. was responsible for the initial conception of the work and original writing of  
847 the manuscript. The experimental design was elaborated by A.G and L.A.B-L. A.G  
848 was responsible for most of the experimental work. D.I. performed some  
849 experiments under the supervision of A.G. The figure preparation was made by A.G  
850 and L.A.B-L. All co-authors have provided useful criticisms and commented on the  
851 manuscript before submission.

852

853 **ACKNOWLEDGEMENTS**

854 Thanks for providing flies and reagents to; Isabel Guerrero (*ptc*-GFP; Centro de  
855 Biología Molecular); Pascal Meier (UAS-*Dronc*-RNAi, UAS-*Drice*-RNAi, UAS-*Dcp*-  
856 RNAi, UAS-*Damm*-RNAi and UAS-*Decay*-RNAi); Alex Gould (anti-Castor antibody,  
857 CRICK Institute) and the Developmental Studies Hybridoma Bank (antibodies),  
858 Addgene (pCDNA3-connexin-GFP-Apex2 plasmid), Bloomington Stock Center (fly  
859 strains), Kyoto Stock Center (fly strains) and DGRC (wild-type cDNA of *dronc*).  
860 Thanks to Genewiz and Bestgene for making the DNA synthesis and generating the  
861 transgenic flies, respectively. Thanks also to Ulrike Gruneberg, Sonia Muliylil, Xavier  
862 Franch-Marro, Jordan Raff and the caspase lab members  
863 (<https://www.caspaselab.com>) for the critical reading of the manuscript and valuable  
864 suggestions. This work has been supported by Cancer Research UK  
865 C49979/A17516 and the John Fell Fund from the University of Oxford 162/001.  
866 L.A.B-L. is a CRUK Career Development Fellow (C49979/A17516) and an Oriol  
867 College Hayward Fellow. A.G. is a postdoctoral fellow of CRUK (C49979/A17516).

868

869

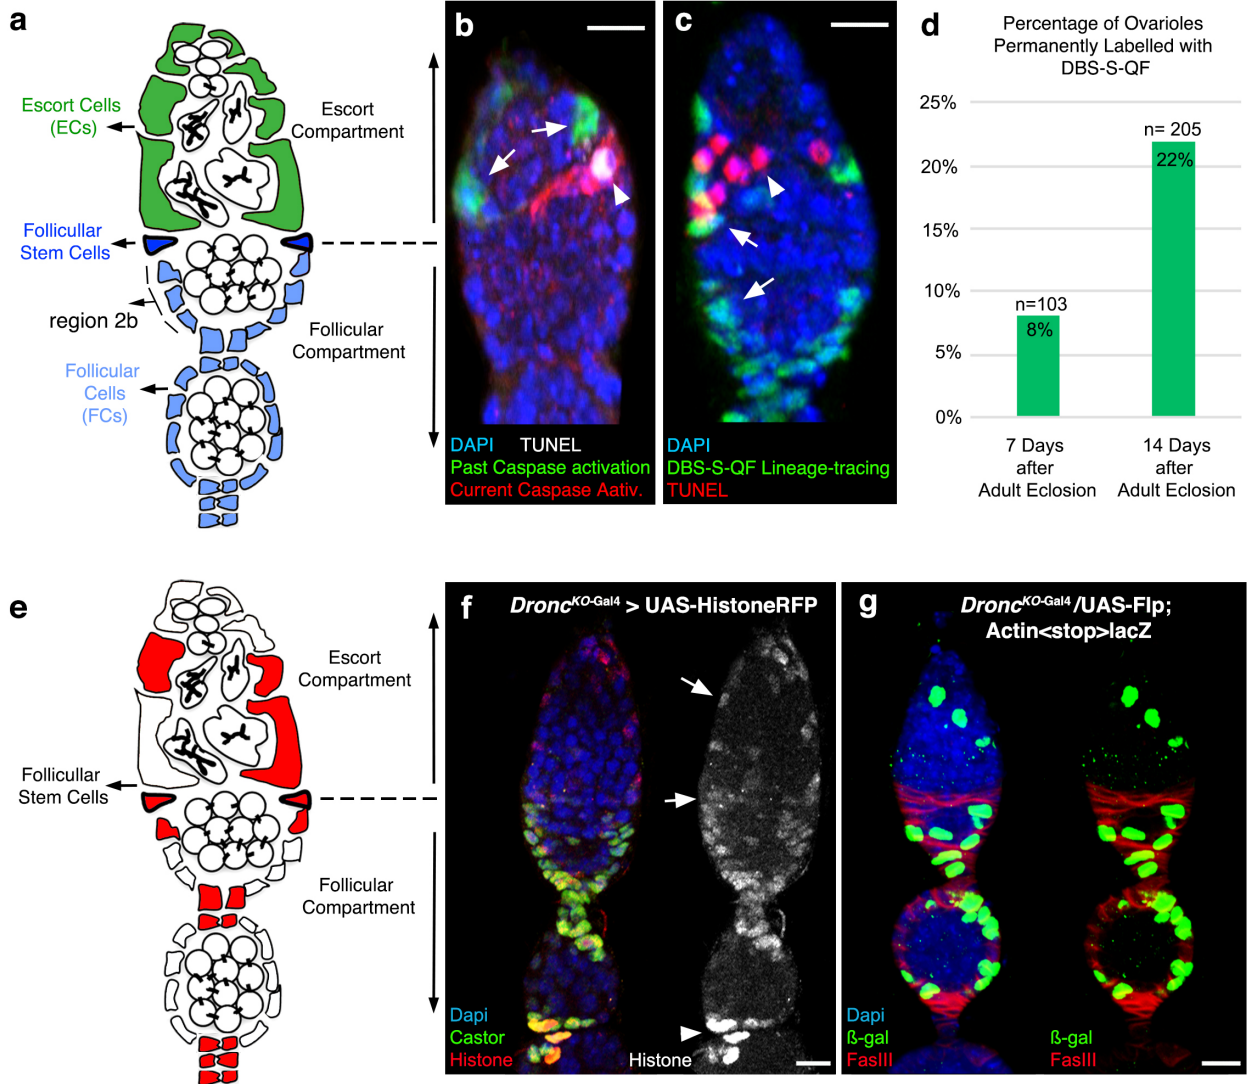

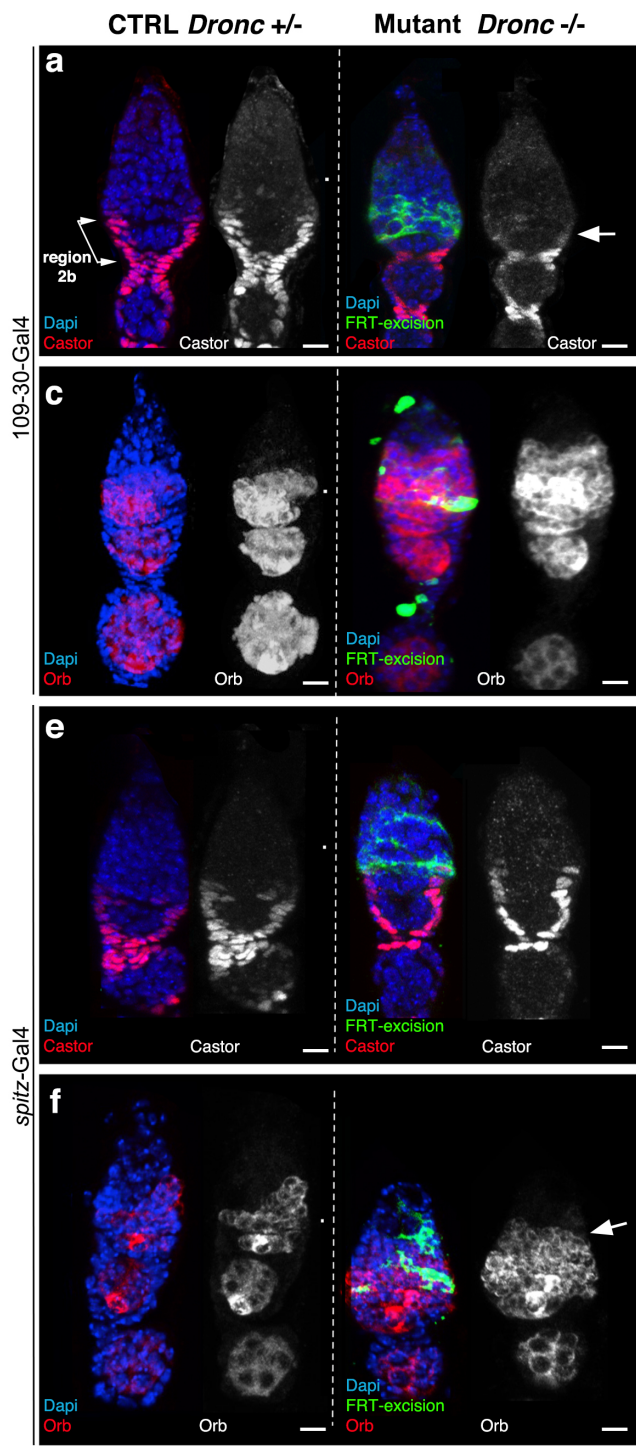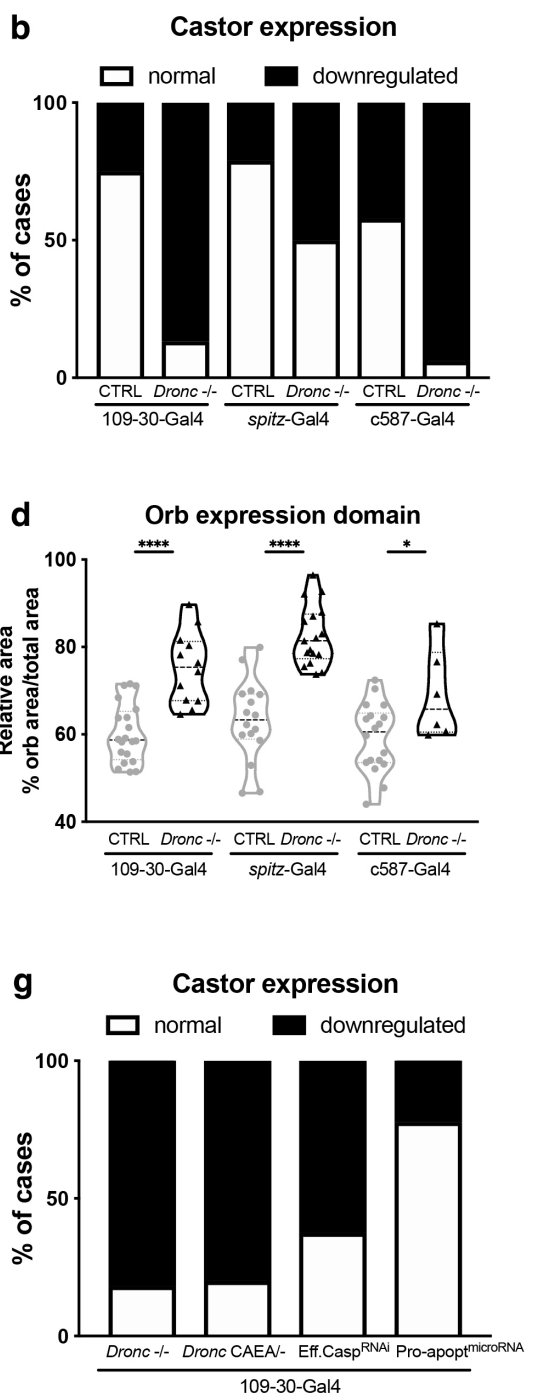

Galasso et al Figure 2

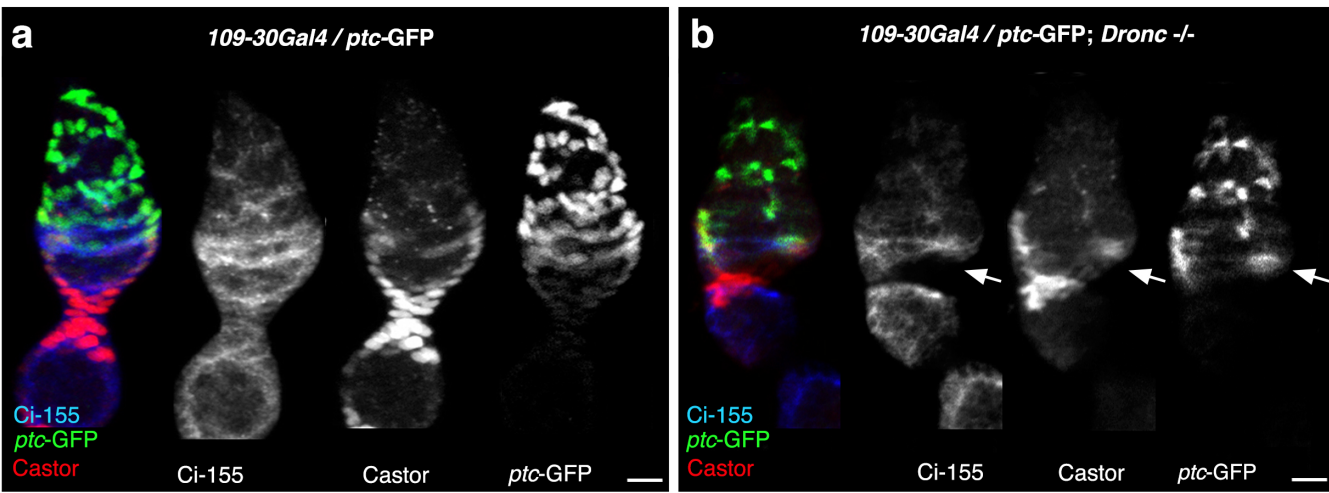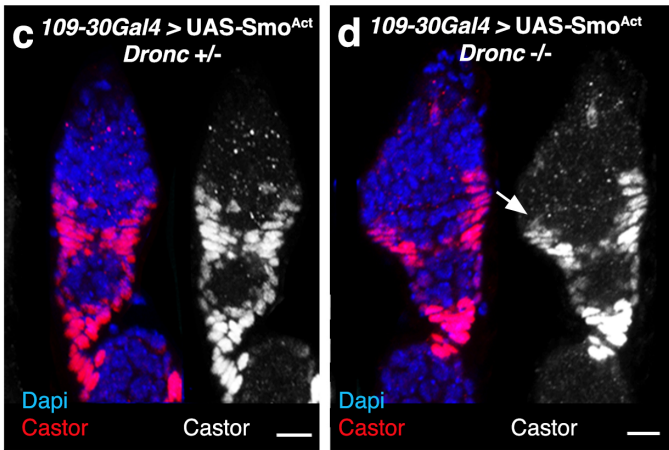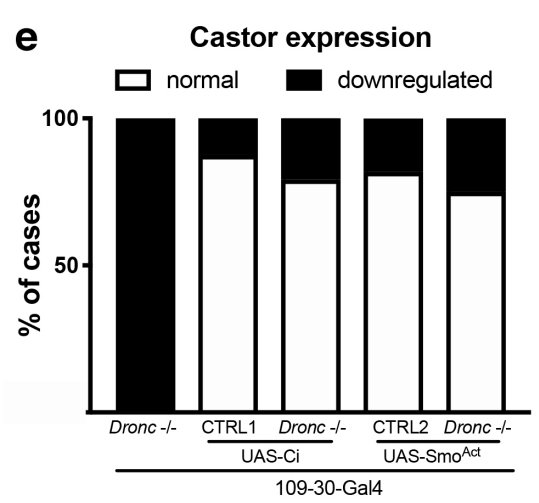

Galasso et al Figure 3

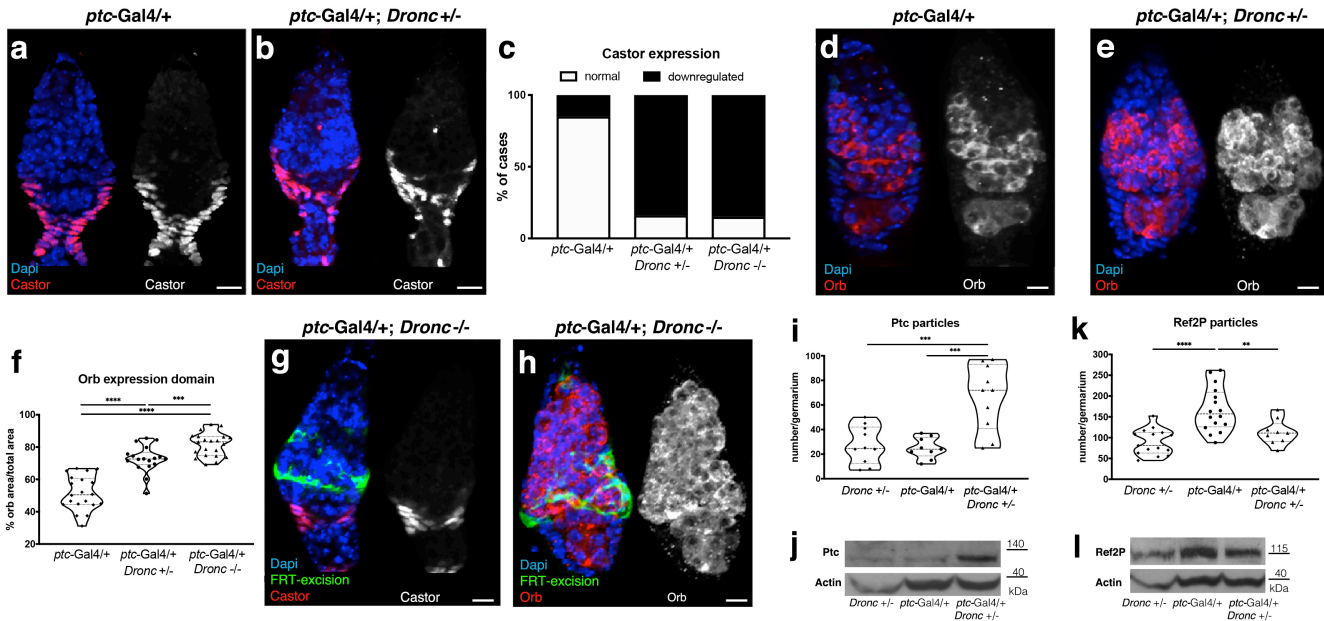

Galasso et al Figure 4

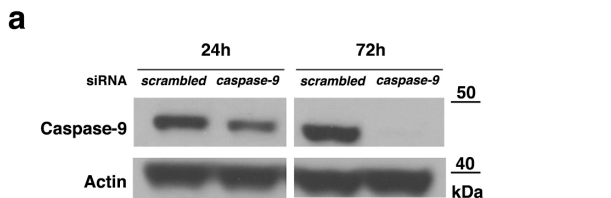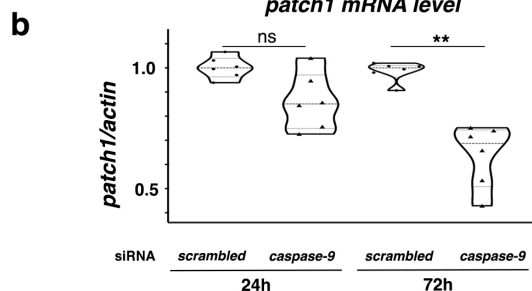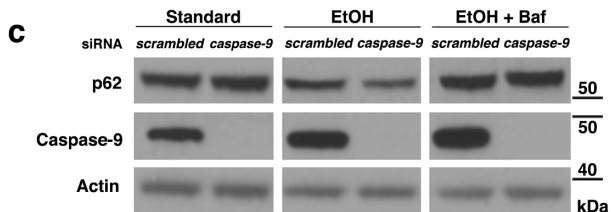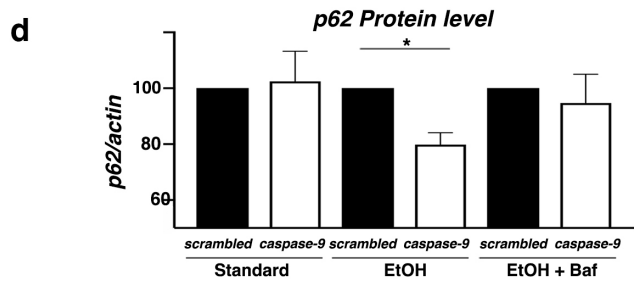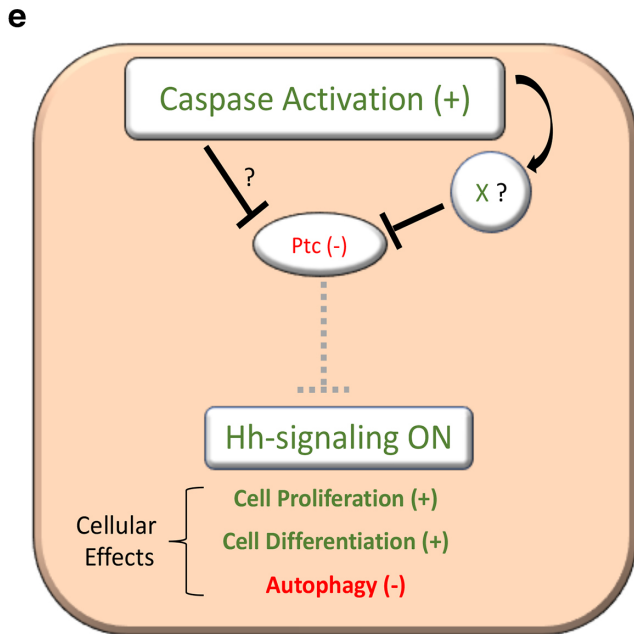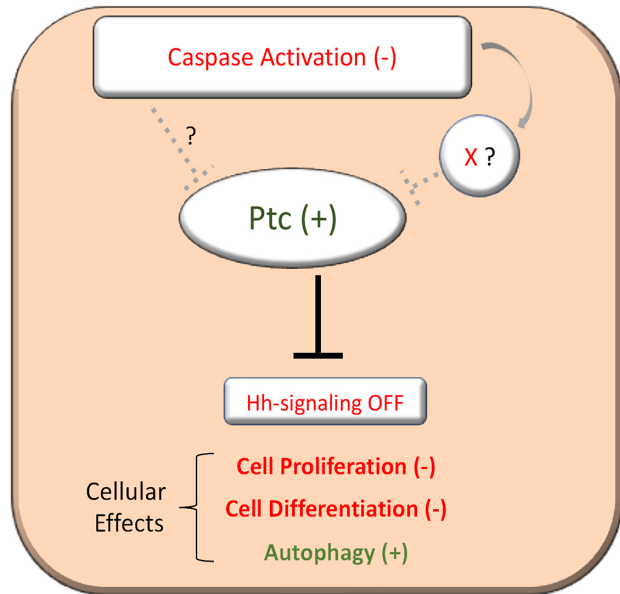

Galasso et al Figure 5
