# Supplementary material for: Non-apoptotic caspase activation sustains ovarian somatic stem cell functions by modulating Hedgehog-signalling and autophagy
Source: bioRxiv or medRxiv preprint supplement (doi:10.1101/722330), 2020-07-27

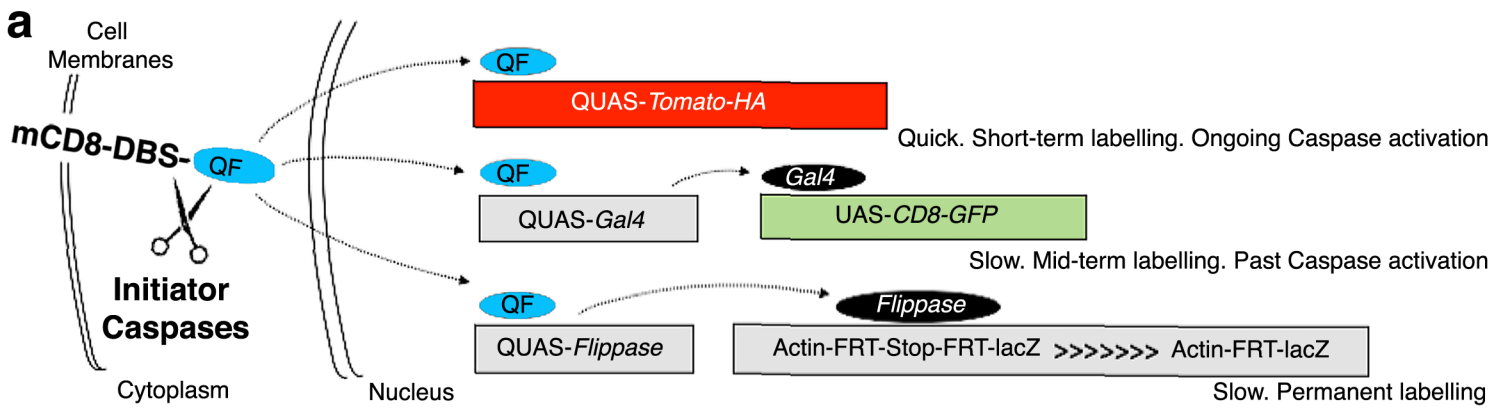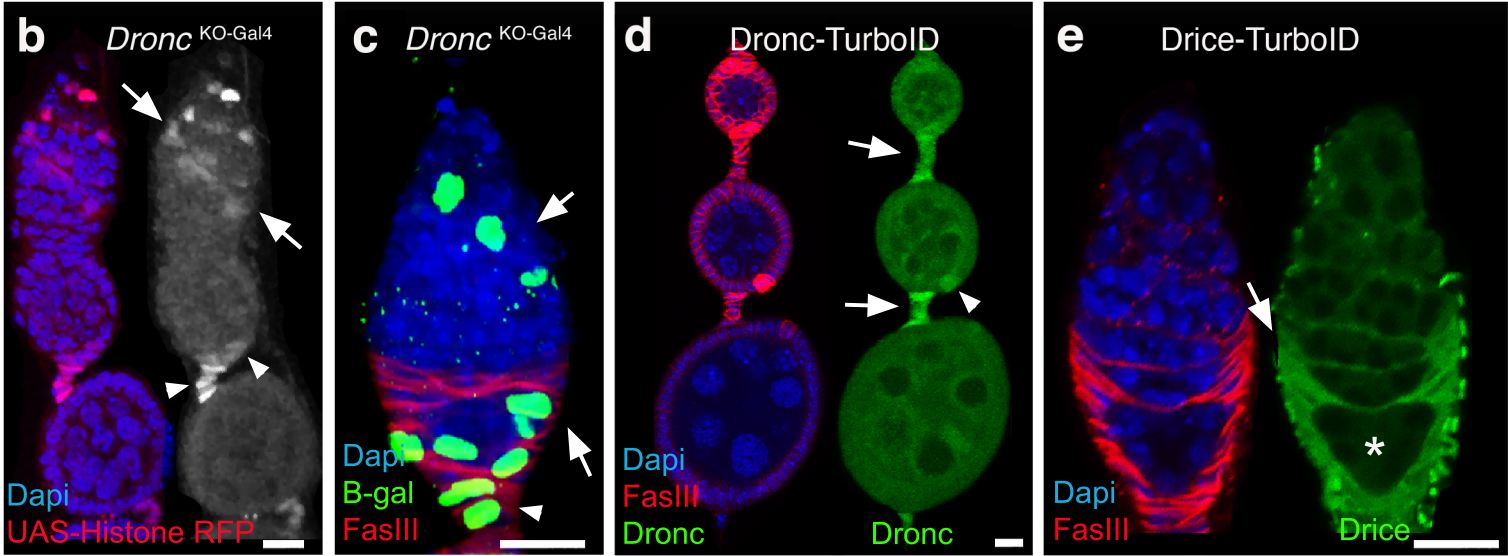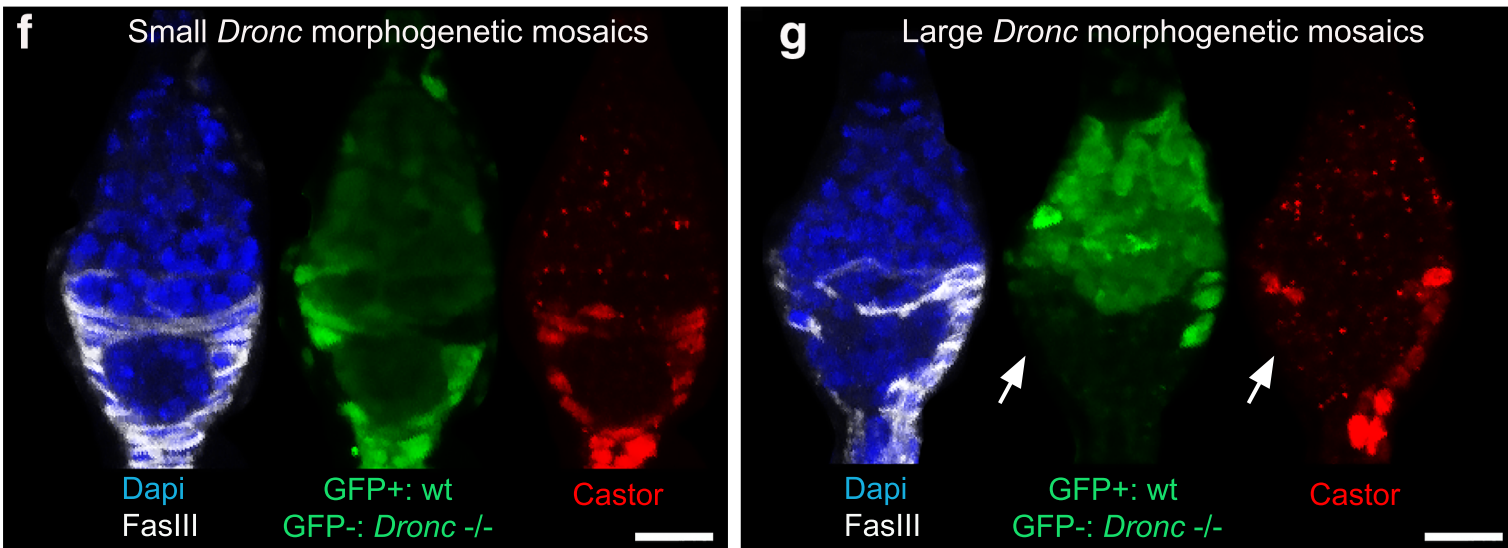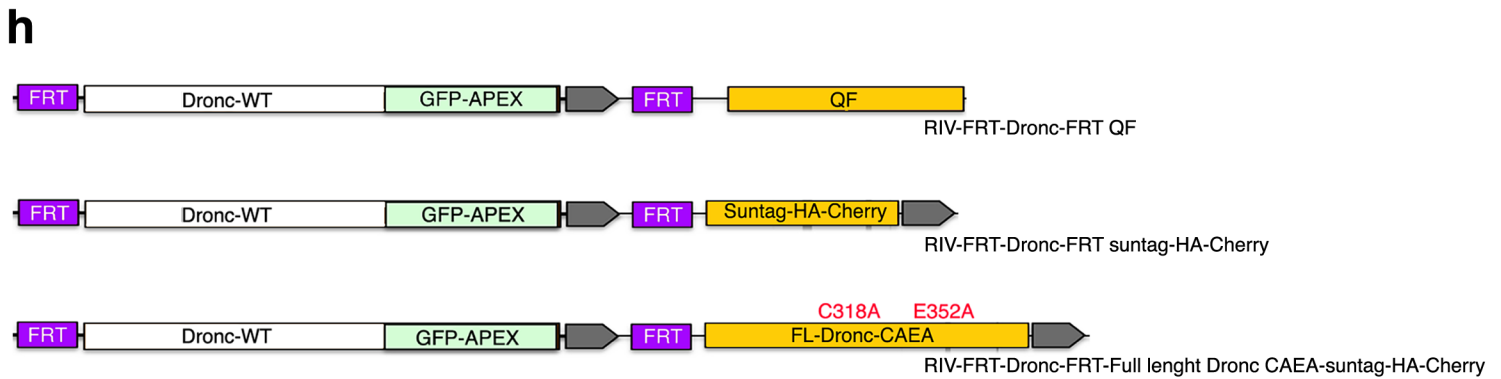

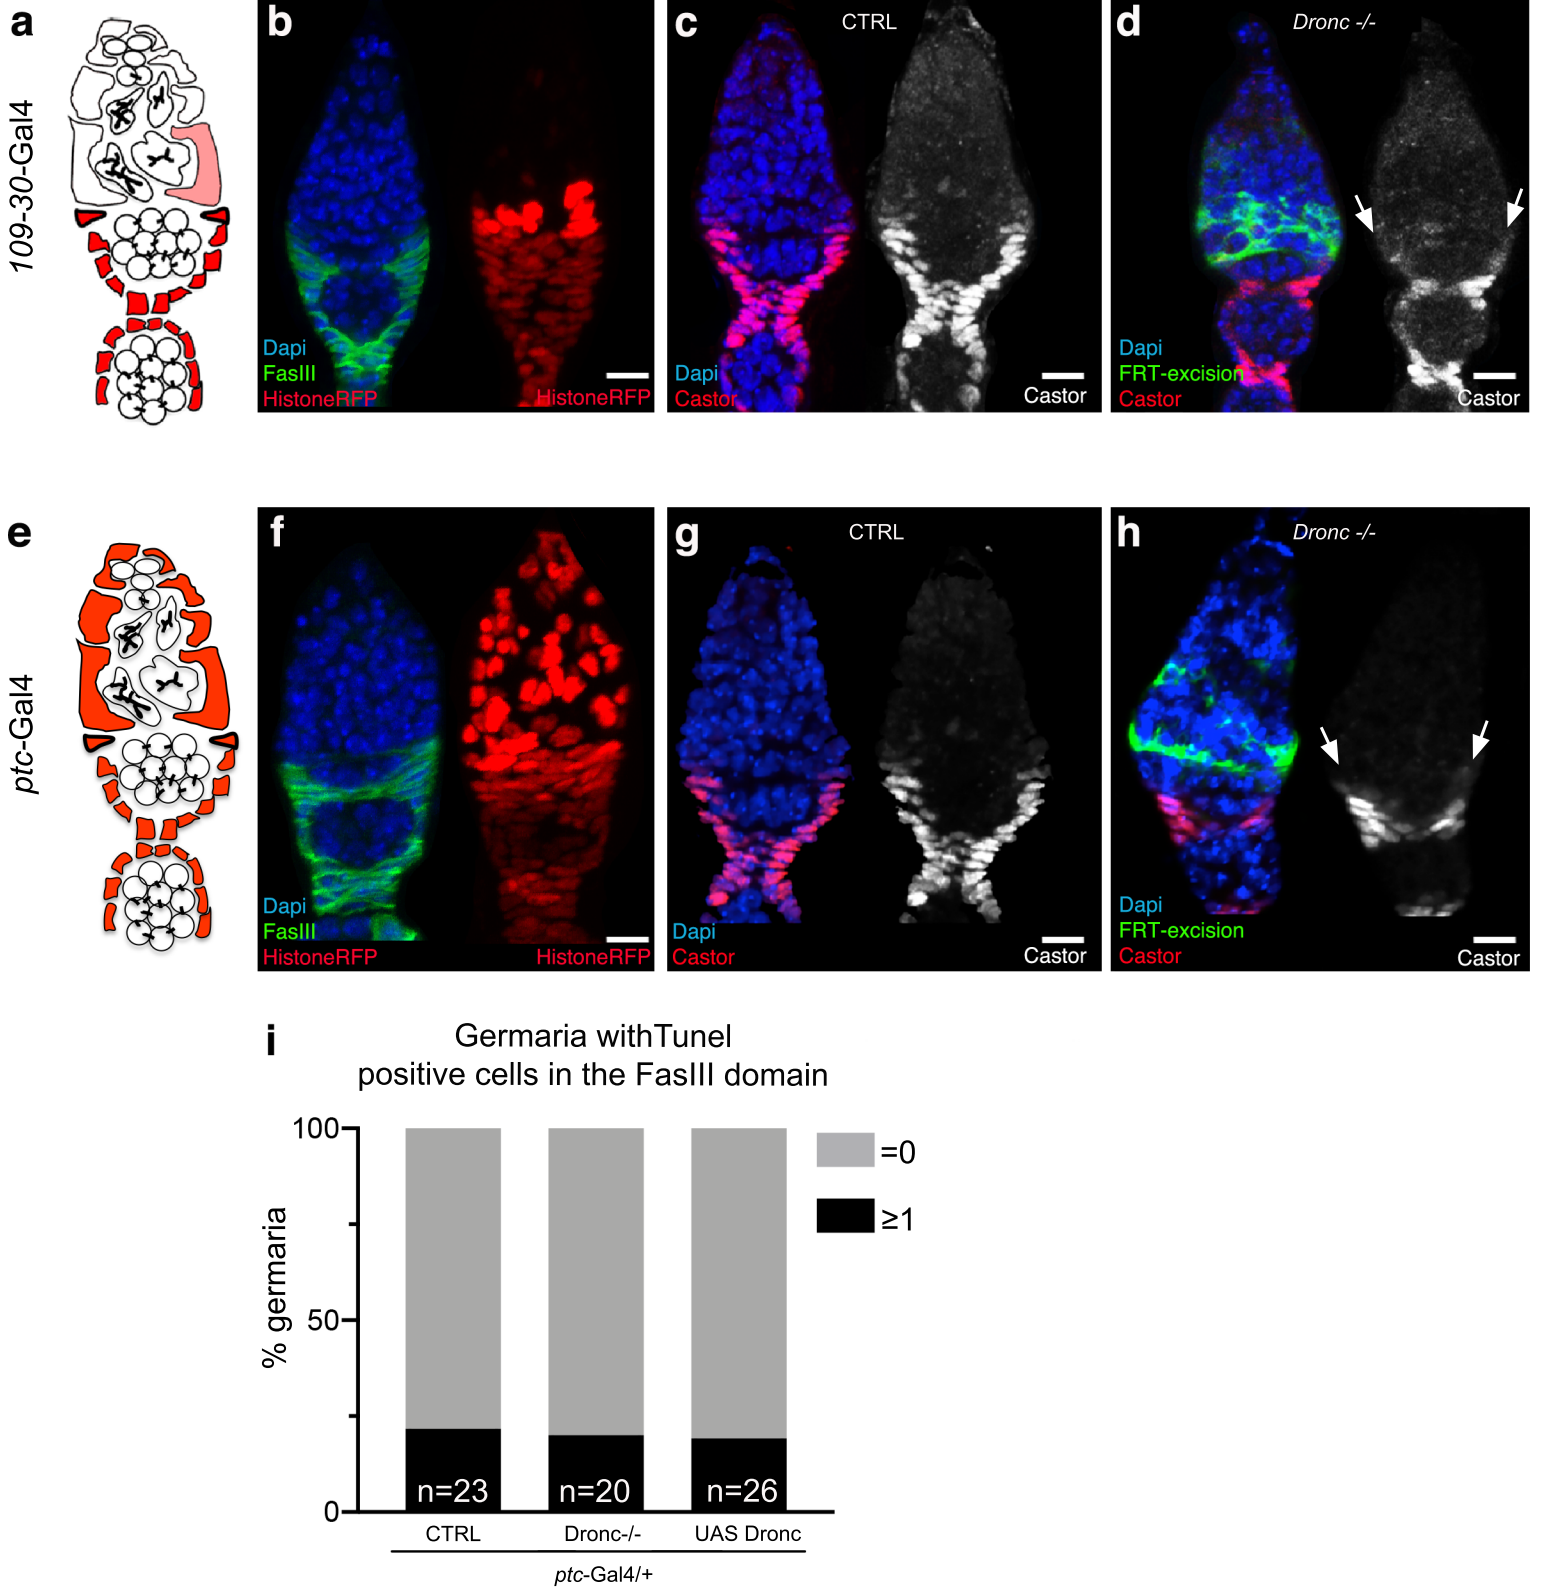

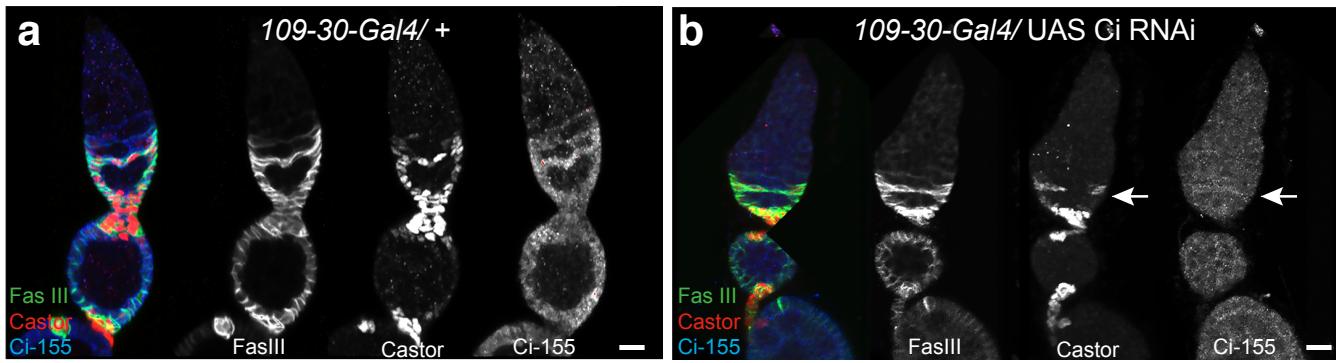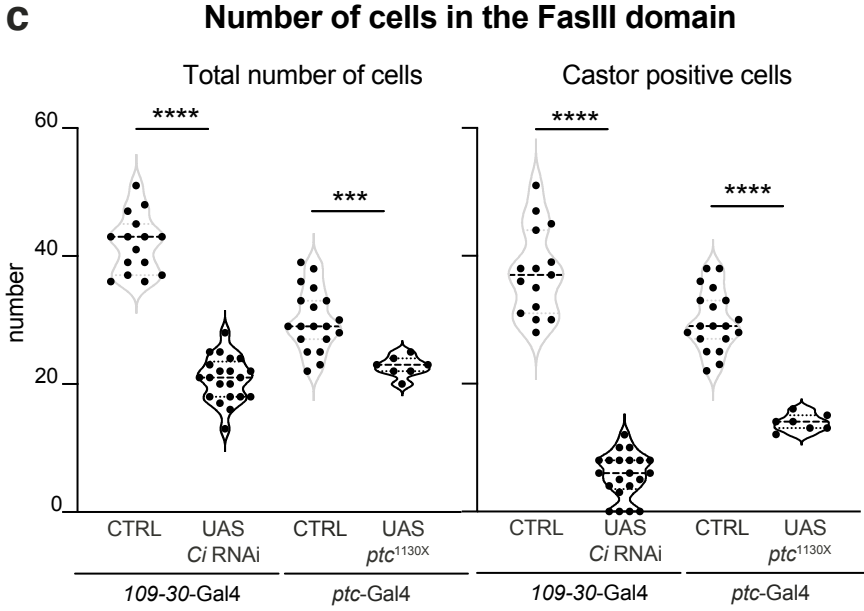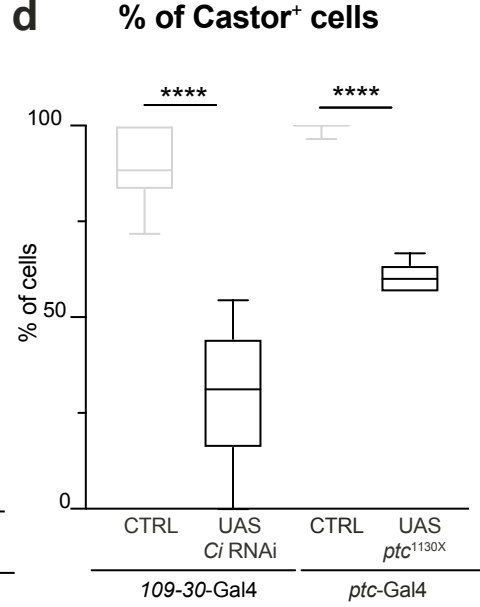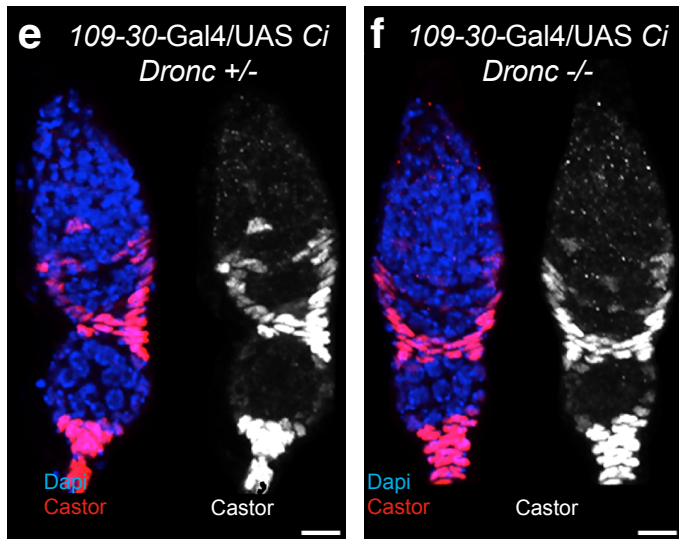



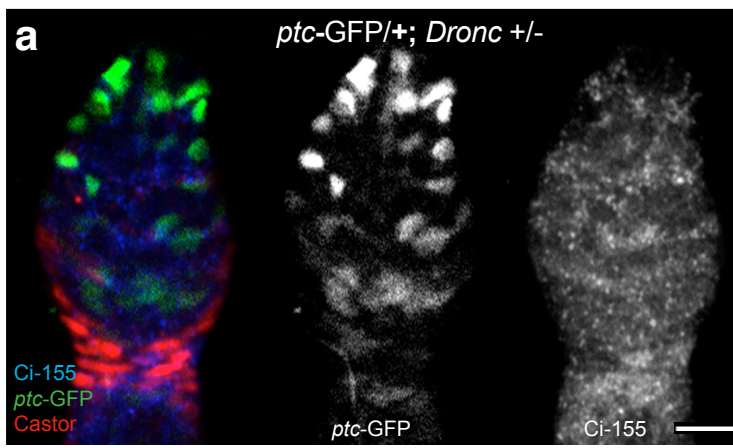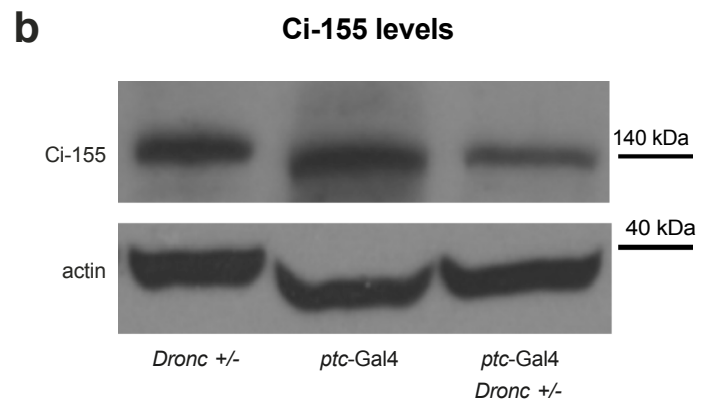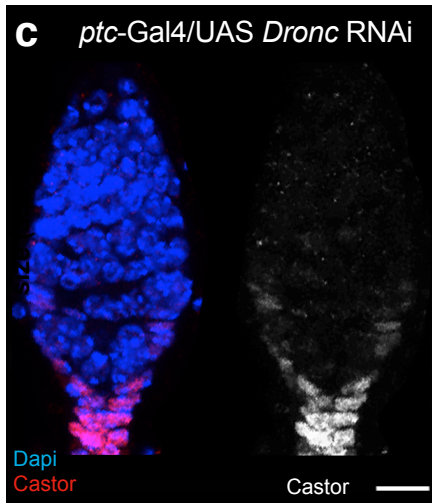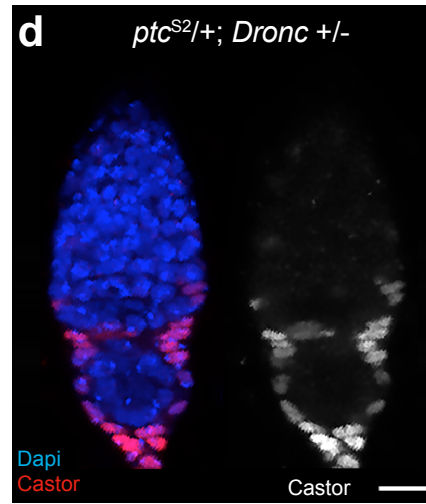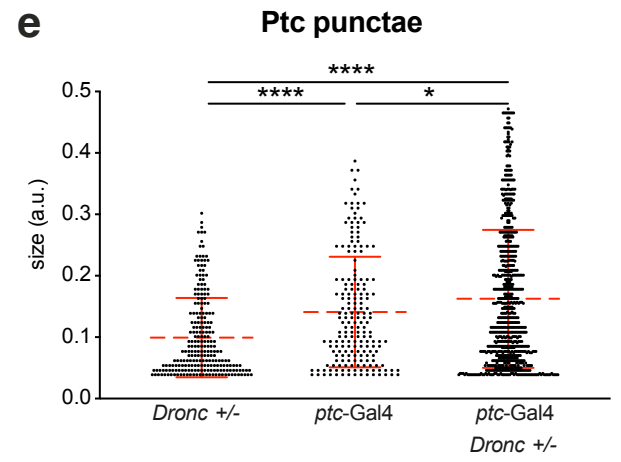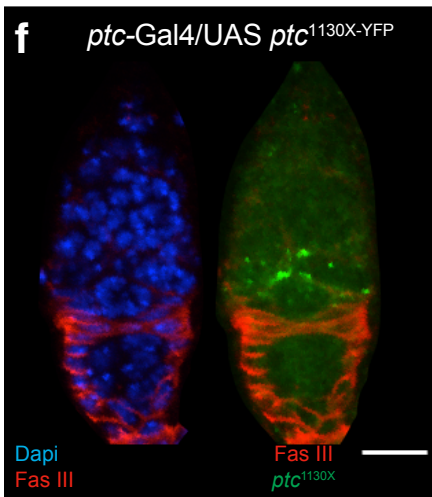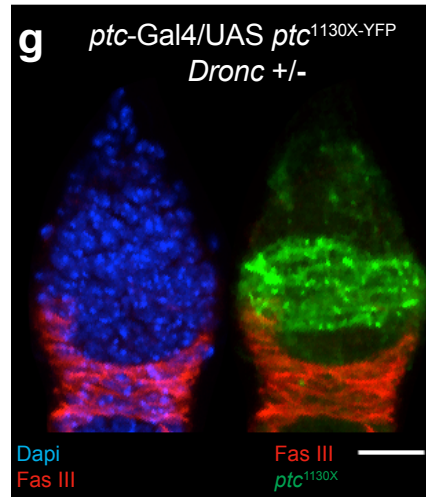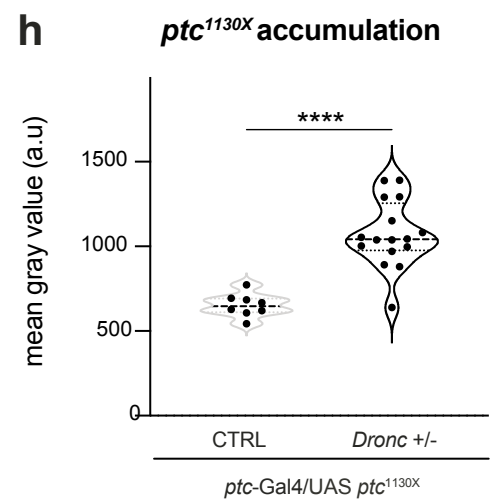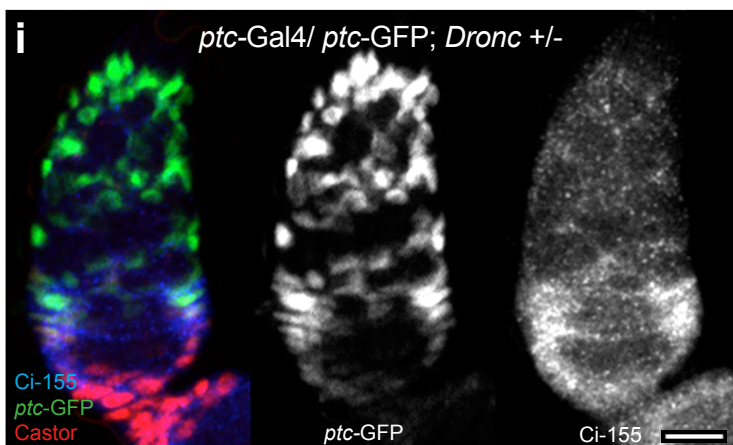

Supplement: Supplementary file [file media-2.pdf]
